# Supplementary material
Source: MDPI journal article supplement (https://www.mdpi.com/2073-4441/15/5/856)
Supplement: s1 [file s1]

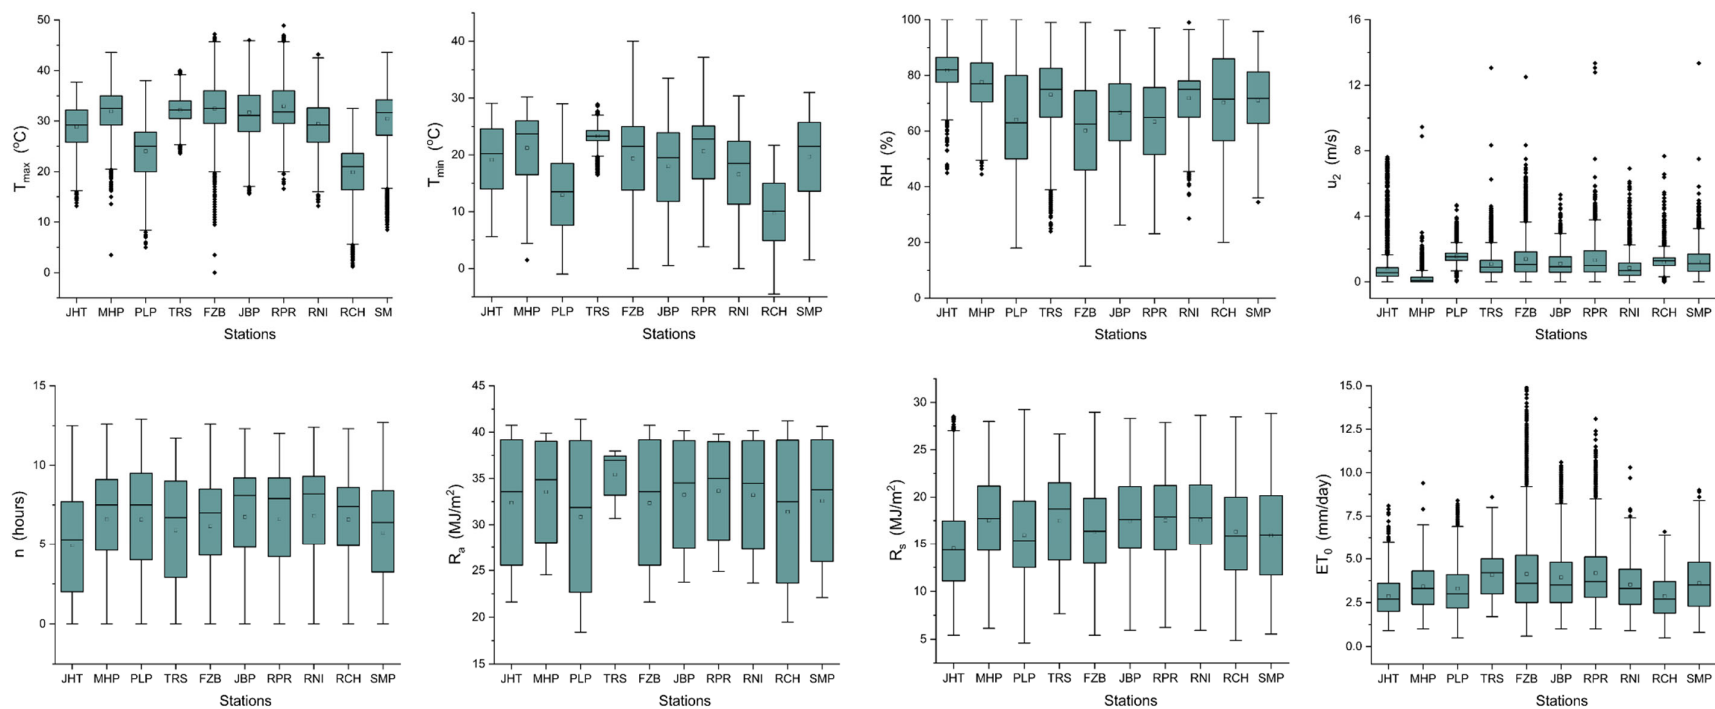

**Figure S1.** Statistical indicators of inputs and output used in the study

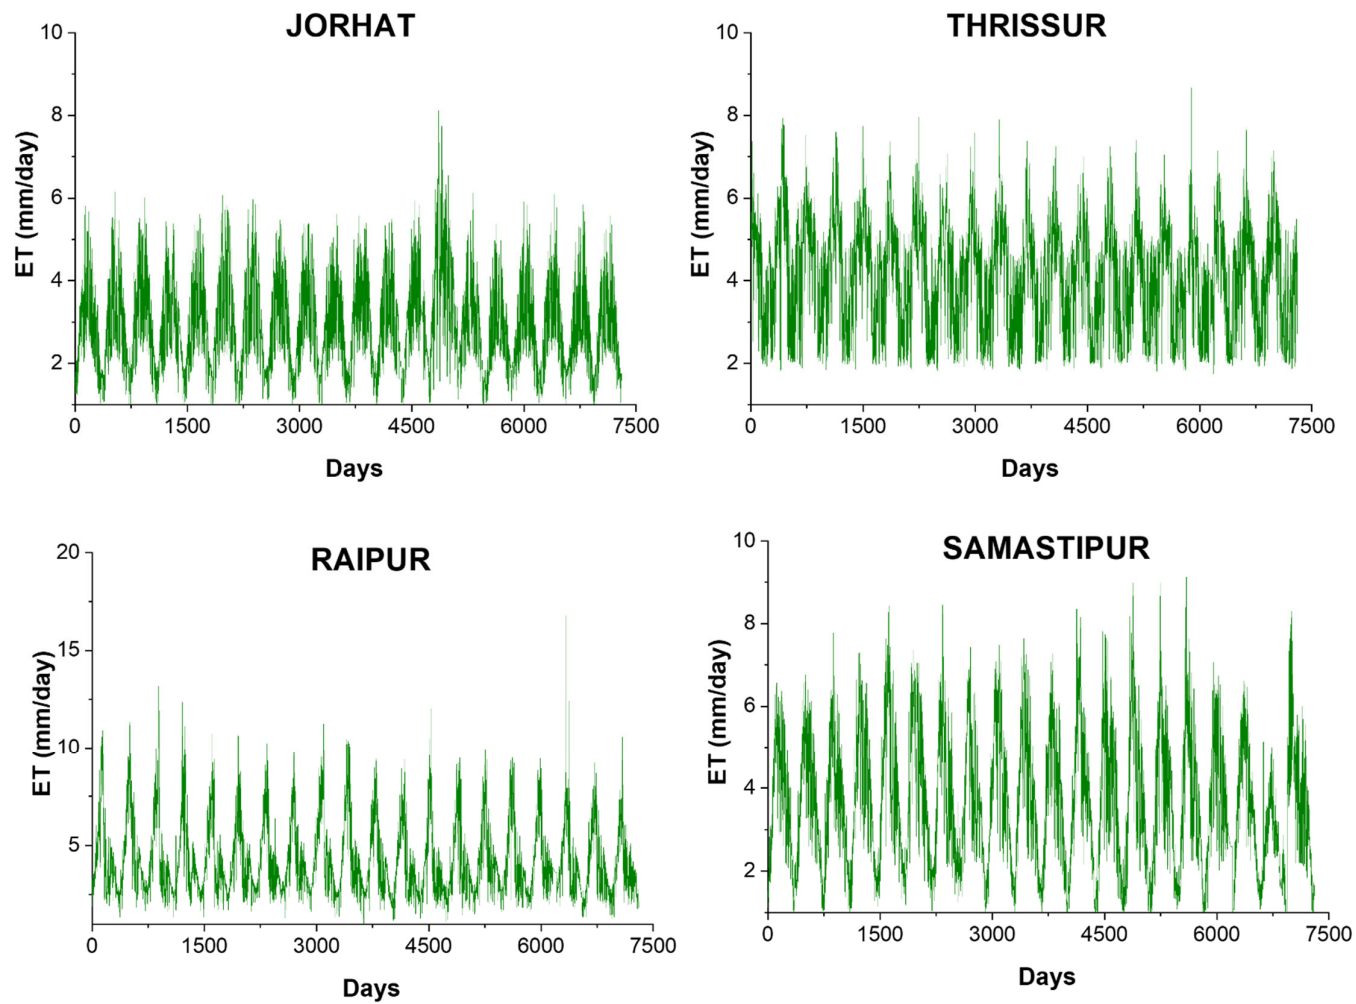

**Figure S2.** Time series graphs of  $ET_0$  (mm/day) at humid (Jorhat, Thrissur) and sub-humid (Raipur, Samastipur) stations

**Table S1.** Performance indicators of empirical models at humid stations

| Jorhat |        |      |               |                |                | Mohanpur |               |                |                | Palampur |      |               |                |                | Thrissur |               |                |                |
|--------|--------|------|---------------|----------------|----------------|----------|---------------|----------------|----------------|----------|------|---------------|----------------|----------------|----------|---------------|----------------|----------------|
| S. No. | MODE L | d    | MBE (mm/da y) | RMSE (mm/da y) | R <sup>2</sup> | d        | MBE (mm/da y) | RMSE (mm/da y) | R <sup>2</sup> | MODE L   | d    | MBE (mm/da y) | RMSE (mm/da y) | R <sup>2</sup> | d        | MBE (mm/da y) | RMSE (mm/da y) | R <sup>2</sup> |
| 1      | ALB    | 0.68 | 1.115         | 1.325          | 0.51           | 0.60     | 1.869         | 2.115          | 0.39           | ALB      | 0.83 | 1.179         | 1.510          | 0.65           | 0.78     | 1.441         | 1.831          | 0.71           |
|        |        | 5    |               |                | 3              | 5        |               |                | 9              |          | 8    |               |                | 6              | 2        |               |                | 3              |
| 2      | MAH    | 0.62 | 1.437         | 1.630          | 0.42           | 0.50     | 2.402         | 2.635          | 0.36           | MAH      | 0.84 | 1.143         | 1.507          | 0.67           | 0.77     | 1.624         | 1.916          | 0.71           |
|        |        | 9    |               |                | 5              | 6        |               |                | 4              |          | 2    |               |                | 2              | 3        |               |                | 3              |
| 3      | PEN    | 0.60 | 1.172         | 1.412          | 0.36           | 0.58     | 1.708         | 2.075          | 0.27           | PEN      | 0.81 | 1.087         | 1.370          | 0.65           | 0.81     | 1.147         | 1.330          | 0.69           |
|        |        | 0    |               |                | 8              | 4        |               |                | 8              |          | 1    |               |                | 5              | 3        |               |                | 8              |
| 4      | JH     | 0.78 | 1.207         | 1.375          | 0.91           | 0.68     | 1.962         | 2.124          | 0.96           | JH       | 0.93 | 0.649         | 0.814          | 0.87           | 0.74     | 1.507         | 1.674          | 0.83           |
|        |        | 5    |               |                | 0              | 7        |               |                | 1              |          | 9    |               |                | 7              | 8        |               |                | 6              |
| 5      | MAK    | 0.91 | 0.465         | 0.574          | 0.84           | 0.94     | 0.442         | 0.518          | 0.88           | MAK      | 0.88 | 0.682         | 0.896          | 0.85           | 0.82     | 0.878         | 1.031          | 0.83           |
|        |        | 5    |               |                | 7              | 4        |               |                | 9              |          | 2    |               |                | 7              | 0        |               |                | 8              |
| 6      | MGB    | 0.43 | 2.890         | 3.222          | 0.48           | 0.47     | 3.037         | 3.275          | 0.57           | MGB      | 0.74 | 1.328         | 1.856          | 0.55           | 0.38     | 2.888         | 3.168          | 0.02           |
|        |        | 5    |               |                | 0              | 5        |               |                | 5              |          | 5    |               |                | 1              | 3        |               |                | 0              |
| 7      | PT     | 0.93 | 0.557         | 0.626          | 0.92           | 0.90     | 0.780         | 0.830          | 0.97           | PT       | 0.93 | 0.608         | 0.725          | 0.78           | 0.87     | 0.665         | 0.785          | 0.64           |
|        |        | 0    |               |                | 5              | 9        |               |                | 8              |          | 7    |               |                | 1              | 9        |               |                | 6              |
| 8      | TUR    | 0.94 | 0.352         | 0.467          | 0.87           | 0.93     | 0.467         | 0.572          | 0.90           | TUR      | 0.97 | 0.319         | 0.451          | 0.90           | 0.95     | 0.318         | 0.502          | 0.85           |
|        |        | 7    |               |                | 2              | 9        |               |                | 8              |          | 5    |               |                | 8              | 2        |               |                | 6              |
| 9      | HS     | 0.70 | 1.048         | 1.237          | 0.48           | 0.77     | 1.040         | 1.205          | 0.67           | HS       | 0.93 | 0.524         | 0.707          | 0.78           | 0.71     | 0.859         | 1.058          | 0.38           |
|        |        | 3    |               |                | 2              | 1        |               |                | 1              |          | 5    |               |                | 2              | 0        |               |                | 2              |
| 10     | HS1    | 0.64 | 1.353         | 1.543          | 0.51           | 0.70     | 1.373         | 1.507          | 0.71           | HS1      | 0.90 | 0.657         | 0.892          | 0.75           | 0.63     | 1.112         | 1.305          | 0.34           |
|        |        | 1    |               |                | 8              | 8        |               |                | 5              |          | 5    |               |                | 6              | 0        |               |                | 1              |
| 11     | HS2    | 0.66 | 1.236         | 1.435          | 0.48           | 0.72     | 1.284         | 1.446          | 0.67           | HS2      | 0.92 | 0.585         | 0.801          | 0.78           | 0.68     | 0.997         | 1.184          | 0.38           |
|        |        | 1    |               |                | 4              | 4        |               |                | 4              |          | 3    |               |                | 2              | 7        |               |                | 3              |
| 12     | THO    | 0.64 | 1.274         | 1.510          | 0.47           | 0.72     | 1.133         | 1.376          | 0.57           | THO      | 0.85 | 0.795         | 0.995          | 0.55           | 0.46     | 1.090         | 1.344          | 0.12           |
|        |        | 9    |               |                | 1              | 6        |               |                | 6              |          | 6    |               |                | 5              | 2        |               |                | 1              |
| 13     | COP    | 0.65 | 1.789         | 1.961          | 0.78           | 0.59     | 2.406         | 2.553          | 0.82           | COP      | 0.74 | 1.824         | 1.990          | 0.84           | 0.69     | 1.840         | 2.003          | 0.85           |
|        |        | 1    |               |                | 8              | 7        |               |                | 1              |          | 3    |               |                | 5              | 3        |               |                | 8              |
| 14     | VA1    | 0.74 | 1.036         | 1.133          | 0.82           | 0.80     | 1.011         | 1.092          | 0.90           | VA1      | 0.56 | 1.946         | 2.225          | 0.44           | 0.59     | 1.705         | 1.937          | 0.47           |
|        |        | 6    |               |                | 7              | 0        |               |                | 7              |          | 4    |               |                | 8              | 5        |               |                | 0              |
| 15     | VA2    | 0.91 | 0.534         | 0.642          | 0.84           | 0.86     | 0.843         | 0.951          | 0.87           | VA2      | 0.96 | 0.370         | 0.501          | 0.88           | 0.94     | 0.496         | 0.589          | 0.84           |
|        |        | 2    |               |                | 6              | 9        |               |                | 4              |          | 7    |               |                | 4              | 4        |               |                | 2              |

**Table S2.** Performance indicators of empirical models at sub-humid stations

| S. No. | MODEL | Faizabad |       |       |                | Jabalpur   |       |       |                | Raipur     |       |       |                |
|--------|-------|----------|-------|-------|----------------|------------|-------|-------|----------------|------------|-------|-------|----------------|
|        |       | d        | MBE   | RMSE  | R <sup>2</sup> | d          | MBE   | RMSE  | R <sup>2</sup> | d          | MBE   | RMSE  | R <sup>2</sup> |
| 1      | ALB   | 0.724    | 2.609 | 3.890 | 0.744          | 0.649      | 2.599 | 4.217 | 0.801          | 0.650      | 2.780 | 4.369 | 0.781          |
| 2      | MAH   | 0.726    | 2.603 | 4.377 | 0.873          | 0.711      | 2.116 | 3.616 | 0.847          | 0.692      | 2.427 | 4.088 | 0.862          |
| 3      | PEN   | 0.849    | 1.551 | 2.036 | 0.619          | 0.817      | 1.569 | 2.118 | 0.716          | 0.816      | 1.682 | 2.188 | 0.688          |
| 4      | JH    | 0.904    | 1.133 | 1.375 | 0.779          | 0.883      | 1.183 | 1.370 | 0.874          | 0.864      | 1.329 | 1.516 | 0.828          |
| 5      | MAK   | 0.699    | 1.286 | 1.935 | 0.713          | 0.785      | 0.920 | 1.334 | 0.756          | 0.738      | 1.062 | 1.544 | 0.698          |
| 6      | MGB   | 0.740    | 2.150 | 2.528 | 0.597          | 0.691      | 2.148 | 2.530 | 0.598          | 0.667      | 2.342 | 2.670 | 0.575          |
| 7      | PT    | 0.818    | 0.898 | 1.519 | 0.642          | 0.895      | 0.613 | 0.944 | 0.755          | 0.863      | 0.707 | 1.098 | 0.711          |
| 8      | TUR   | 0.887    | 0.774 | 1.236 | 0.757          | 0.951      | 0.529 | 0.728 | 0.831          | 0.924      | 0.629 | 0.900 | 0.773          |
| 9      | HS    | 0.865    | 1.097 | 1.393 | 0.684          | 0.887      | 0.991 | 1.149 | 0.794          | 0.900      | 0.887 | 1.063 | 0.774          |
| 10     | HS1   | 0.852    | 1.255 | 1.499 | 0.703          | 0.854      | 1.202 | 1.344 | 0.816          | 0.869      | 1.081 | 1.242 | 0.802          |
| 11     | HS2   | 0.856    | 1.255 | 1.510 | 0.686          | 0.855      | 1.216 | 1.383 | 0.796          | 0.876      | 1.067 | 1.246 | 0.777          |
| 12     | THO   | 0.826    | 1.118 | 1.482 | 0.616          | 0.864      | 0.850 | 1.125 | 0.622          | 0.829      | 0.949 | 1.239 | 0.623          |
| 13     | COP   | 0.819    | 1.644 | 1.849 | 0.702          | 0.735      | 1.961 | 2.175 | 0.708          | 0.752      | 1.865 | 2.103 | 0.662          |
| 14     | VA1   | 0.510    | 2.670 | 3.311 | 0.262          | 0.512      | 2.254 | 2.737 | 0.224          | 0.505      | 2.374 | 2.891 | 0.212          |
| 15     | VA2   | 0.868    | 0.860 | 1.304 | 0.708          | 0.925      | 0.693 | 0.853 | 0.801          | 0.908      | 0.756 | 0.965 | 0.752          |
| S. No. | MODEL | Ranchi   |       |       |                | Ranichauri |       |       |                | Samastipur |       |       |                |
|        |       | d        | MBE   | RMSE  | R <sup>2</sup> | d          | MBE   | RMSE  | R <sup>2</sup> | d          | MBE   | RMSE  | R <sup>2</sup> |
| 1      | ALB   | 0.781    | 1.217 | 1.621 | 0.545          | 0.794      | 1.070 | 1.349 | 0.532          | 0.724      | 2.609 | 3.890 | 0.744          |
| 2      | MAH   | 0.768    | 1.337 | 1.634 | 0.554          | 0.752      | 1.143 | 1.436 | 0.535          | 0.726      | 2.603 | 4.377 | 0.873          |
| 3      | PEN   | 0.773    | 1.146 | 1.385 | 0.480          | 0.672      | 1.357 | 1.603 | 0.526          | 0.849      | 1.551 | 2.036 | 0.619          |
| 4      | JH    | 0.819    | 1.273 | 1.489 | 0.912          | 0.955      | 0.492 | 0.611 | 0.934          | 0.904      | 1.133 | 1.375 | 0.779          |
| 5      | MAK   | 0.899    | 0.563 | 0.742 | 0.825          | 0.964      | 0.339 | 0.437 | 0.942          | 0.699      | 1.286 | 1.935 | 0.713          |
| 6      | MGB   | 0.601    | 2.198 | 2.542 | 0.584          | 0.766      | 1.102 | 1.529 | 0.609          | 0.740      | 2.150 | 2.528 | 0.597          |
| 7      | PT    | 0.949    | 0.517 | 0.615 | 0.893          | 0.951      | 0.475 | 0.583 | 0.879          | 0.818      | 0.898 | 1.519 | 0.642          |
| 8      | TUR   | 0.956    | 0.385 | 0.502 | 0.863          | 0.986      | 0.230 | 0.299 | 0.950          | 0.887      | 0.774 | 1.236 | 0.757          |
| 9      | HS    | 0.830    | 0.983 | 1.164 | 0.745          | 0.949      | 0.397 | 0.540 | 0.832          | 0.865      | 1.097 | 1.393 | 0.684          |
| 10     | HS1   | 0.778    | 1.244 | 1.408 | 0.762          | 0.912      | 0.559 | 0.744 | 0.815          | 0.852      | 1.255 | 1.499 | 0.703          |

|    |     |       |       |       |       |       |       |       |       |       |       |       |       |
|----|-----|-------|-------|-------|-------|-------|-------|-------|-------|-------|-------|-------|-------|
| 11 | HS2 | 0.784 | 1.224 | 1.410 | 0.747 | 0.936 | 0.458 | 0.628 | 0.832 | 0.856 | 1.255 | 1.510 | 0.686 |
| 12 | THO | 0.855 | 0.715 | 0.955 | 0.587 | 0.856 | 0.724 | 0.875 | 0.599 | 0.826 | 1.118 | 1.482 | 0.616 |
| 13 | COP | 0.635 | 2.232 | 2.405 | 0.758 | 0.654 | 2.178 | 2.307 | 0.920 | 0.819 | 1.644 | 1.849 | 0.702 |
| 14 | VA1 | 0.668 | 1.467 | 1.634 | 0.700 | 0.648 | 1.408 | 1.600 | 0.619 | 0.510 | 2.670 | 3.311 | 0.262 |
| 15 | VA2 | 0.928 | 0.606 | 0.707 | 0.866 | 0.987 | 0.222 | 0.278 | 0.951 | 0.868 | 0.860 | 1.304 | 0.708 |

**Table S3.** Performance indicators of conventional ML models at Jorhat

| RANK | MODEL | GPI    | d     | MBE   | RMSE  | R <sup>2</sup> | MODEL | GPI    | d     | MBE   | RMSE  | R <sup>2</sup> | MODEL | GPI    | d     | MBE   | RMSE  | R <sup>2</sup> |
|------|-------|--------|-------|-------|-------|----------------|-------|--------|-------|-------|-------|----------------|-------|--------|-------|-------|-------|----------------|
| 1    | RF17  | 1.416  | 0.987 | 0.106 | 0.240 | 0.952          | XGB17 | 1.636  | 0.993 | 0.086 | 0.177 | 0.974          | LGB18 | 1.589  | 0.992 | 0.082 | 0.192 | 0.970          |
| 2    | RF18  | 1.379  | 0.985 | 0.109 | 0.252 | 0.947          | XGB18 | 1.610  | 0.992 | 0.088 | 0.186 | 0.971          | LGB17 | 1.588  | 0.992 | 0.085 | 0.190 | 0.970          |
| 3    | RF8   | 1.320  | 0.985 | 0.139 | 0.253 | 0.946          | XGB8  | 1.411  | 0.988 | 0.136 | 0.228 | 0.956          | LGB8  | 1.379  | 0.988 | 0.132 | 0.232 | 0.954          |
| 4    | RF9   | 1.319  | 0.985 | 0.140 | 0.254 | 0.946          | XGB9  | 1.056  | 0.976 | 0.176 | 0.322 | 0.910          | LGB12 | 1.106  | 0.979 | 0.160 | 0.301 | 0.922          |
| 5    | RF12  | 1.081  | 0.977 | 0.169 | 0.315 | 0.914          | XGB12 | 1.039  | 0.976 | 0.181 | 0.325 | 0.909          | LGB9  | 1.101  | 0.979 | 0.161 | 0.302 | 0.921          |
| 6    | RF7   | 0.943  | 0.973 | 0.201 | 0.340 | 0.900          | XGB7  | 0.901  | 0.972 | 0.209 | 0.350 | 0.894          | LGB7  | 0.923  | 0.974 | 0.196 | 0.334 | 0.904          |
| 7    | RF5   | 0.890  | 0.972 | 0.212 | 0.350 | 0.894          | XGB5  | 0.882  | 0.971 | 0.215 | 0.353 | 0.892          | LGB5  | 0.903  | 0.974 | 0.202 | 0.336 | 0.902          |
| 8    | RF16  | 0.803  | 0.969 | 0.247 | 0.356 | 0.892          | XGB16 | 0.851  | 0.972 | 0.245 | 0.345 | 0.897          | LGB16 | 0.861  | 0.974 | 0.232 | 0.331 | 0.906          |
| 9    | RF15  | 0.677  | 0.965 | 0.271 | 0.380 | 0.876          | XGB15 | 0.681  | 0.966 | 0.274 | 0.378 | 0.876          | LGB15 | 0.681  | 0.968 | 0.263 | 0.363 | 0.886          |
| 10   | RF14  | 0.224  | 0.946 | 0.333 | 0.470 | 0.809          | XGB14 | 0.133  | 0.943 | 0.345 | 0.486 | 0.797          | LGB14 | 0.203  | 0.950 | 0.321 | 0.453 | 0.822          |
| 11   | RF4   | 0.042  | 0.938 | 0.361 | 0.502 | 0.783          | XGB4  | 0.000  | 0.937 | 0.365 | 0.508 | 0.778          | LGB4  | 0.050  | 0.944 | 0.344 | 0.477 | 0.803          |
| 12   | RF13  | -0.587 | 0.901 | 0.445 | 0.599 | 0.689          | XGB13 | -0.630 | 0.902 | 0.447 | 0.604 | 0.685          | LGB13 | -0.625 | 0.909 | 0.426 | 0.577 | 0.712          |
| 13   | RF10  | -0.619 | 0.901 | 0.442 | 0.612 | 0.678          | XGB10 | -0.739 | 0.897 | 0.452 | 0.628 | 0.663          | LGB10 | -0.736 | 0.905 | 0.429 | 0.600 | 0.689          |
| 14   | RF2   | -1.151 | 0.870 | 0.516 | 0.687 | 0.597          | XGB2  | -1.178 | 0.872 | 0.513 | 0.687 | 0.599          | LGB2  | -1.168 | 0.881 | 0.488 | 0.654 | 0.631          |
| 15   | RF11  | -1.507 | 0.839 | 0.546 | 0.729 | 0.541          | XGB11 | -1.562 | 0.843 | 0.547 | 0.736 | 0.537          | LGB11 | -1.669 | 0.846 | 0.535 | 0.712 | 0.562          |
| 16   | RF6   | -1.694 | 0.830 | 0.570 | 0.759 | 0.508          | XGB6  | -1.786 | 0.828 | 0.568 | 0.766 | 0.501          | LGB6  | -1.762 | 0.842 | 0.543 | 0.726 | 0.544          |
| 17   | RF3   | -1.950 | 0.806 | 0.593 | 0.785 | 0.469          | XGB3  | -1.941 | 0.814 | 0.586 | 0.779 | 0.480          | LGB3  | -2.017 | 0.819 | 0.564 | 0.749 | 0.513          |
| 18   | RF1   | -2.584 | 0.767 | 0.673 | 0.876 | 0.371          | XGB1  | -2.364 | 0.783 | 0.636 | 0.827 | 0.418          | LGB1  | -2.407 | 0.795 | 0.610 | 0.792 | 0.457          |

**Table S4.** Performance indicators of conventional ML models at Mohanpur

| RANK | MODEL | GPI    | d     | MBE   | RMSE  | R <sup>2</sup> | MODEL | GPI    | d     | MBE   | RMSE  | R <sup>2</sup> | MODEL | GPI    | d     | MBE   | RMSE  | R <sup>2</sup> |
|------|-------|--------|-------|-------|-------|----------------|-------|--------|-------|-------|-------|----------------|-------|--------|-------|-------|-------|----------------|
| 1    | RF17  | 1.541  | 0.998 | 0.075 | 0.117 | 0.991          | XGB17 | 1.741  | 0.998 | 0.064 | 0.096 | 0.994          | LGB17 | 1.710  | 0.998 | 0.064 | 0.097 | 0.994          |
| 2    | RF18  | 1.522  | 0.997 | 0.076 | 0.123 | 0.990          | XGB18 | 1.703  | 0.998 | 0.069 | 0.106 | 0.992          | LGB18 | 1.676  | 0.998 | 0.065 | 0.107 | 0.992          |
| 3    | RF9   | 1.426  | 0.997 | 0.097 | 0.142 | 0.986          | XGB8  | 1.553  | 0.997 | 0.098 | 0.137 | 0.987          | LGB8  | 1.535  | 0.997 | 0.093 | 0.133 | 0.988          |
| 4    | RF8   | 1.424  | 0.997 | 0.098 | 0.142 | 0.986          | XGB9  | 1.238  | 0.992 | 0.132 | 0.211 | 0.970          | LGB9  | 1.237  | 0.993 | 0.126 | 0.199 | 0.973          |
| 5    | RF12  | 1.166  | 0.993 | 0.128 | 0.206 | 0.971          | XGB12 | 1.211  | 0.992 | 0.136 | 0.216 | 0.968          | LGB12 | 1.214  | 0.993 | 0.128 | 0.204 | 0.972          |
| 6    | RF7   | 1.128  | 0.992 | 0.138 | 0.211 | 0.970          | XGB7  | 1.177  | 0.992 | 0.144 | 0.221 | 0.967          | LGB7  | 1.185  | 0.993 | 0.136 | 0.206 | 0.971          |
| 7    | RF5   | 1.034  | 0.991 | 0.152 | 0.230 | 0.964          | XGB5  | 1.094  | 0.990 | 0.156 | 0.235 | 0.963          | LGB5  | 1.089  | 0.991 | 0.149 | 0.224 | 0.966          |
| 8    | RF16  | 0.851  | 0.988 | 0.187 | 0.260 | 0.954          | XGB16 | 0.923  | 0.988 | 0.189 | 0.260 | 0.954          | LGB16 | 0.899  | 0.989 | 0.181 | 0.252 | 0.957          |
| 9    | RF15  | 0.819  | 0.988 | 0.192 | 0.265 | 0.952          | XGB15 | 0.877  | 0.987 | 0.195 | 0.268 | 0.951          | LGB15 | 0.860  | 0.988 | 0.187 | 0.257 | 0.955          |
| 10   | RF14  | 0.385  | 0.979 | 0.248 | 0.343 | 0.920          | XGB14 | 0.385  | 0.978 | 0.252 | 0.350 | 0.917          | LGB14 | 0.372  | 0.980 | 0.242 | 0.335 | 0.924          |
| 11   | RF4   | 0.244  | 0.976 | 0.265 | 0.367 | 0.909          | XGB4  | 0.263  | 0.976 | 0.266 | 0.369 | 0.908          | LGB4  | 0.259  | 0.978 | 0.255 | 0.352 | 0.916          |
| 12   | RF11  | -1.176 | 0.938 | 0.407 | 0.568 | 0.782          | XGB11 | -1.392 | 0.935 | 0.417 | 0.584 | 0.770          | LGB11 | -1.354 | 0.941 | 0.396 | 0.554 | 0.792          |
| 13   | RF10  | -1.221 | 0.937 | 0.421 | 0.572 | 0.779          | XGB10 | -1.411 | 0.935 | 0.428 | 0.585 | 0.771          | LGB10 | -1.392 | 0.941 | 0.409 | 0.556 | 0.791          |
| 14   | RF13  | -1.362 | 0.933 | 0.436 | 0.586 | 0.767          | XGB13 | -1.548 | 0.931 | 0.442 | 0.597 | 0.760          | LGB13 | -1.511 | 0.937 | 0.421 | 0.567 | 0.782          |
| 15   | RF6   | -1.598 | 0.926 | 0.455 | 0.618 | 0.744          | XGB6  | -1.695 | 0.927 | 0.452 | 0.615 | 0.746          | LGB6  | -1.661 | 0.933 | 0.431 | 0.584 | 0.769          |
| 16   | RF3   | -1.746 | 0.921 | 0.472 | 0.633 | 0.730          | XGB3  | -1.790 | 0.924 | 0.464 | 0.623 | 0.739          | LGB3  | -1.771 | 0.930 | 0.441 | 0.594 | 0.761          |
| 17   | RF2   | -1.979 | 0.914 | 0.500 | 0.658 | 0.710          | XGB2  | -2.070 | 0.917 | 0.493 | 0.652 | 0.716          | LGB2  | -2.058 | 0.923 | 0.471 | 0.621 | 0.739          |
| 18   | RF1   | -2.459 | 0.899 | 0.544 | 0.712 | 0.665          | XGB1  | -2.259 | 0.910 | 0.508 | 0.668 | 0.700          | LGB1  | -2.290 | 0.916 | 0.489 | 0.642 | 0.721          |

**Table S5.** Performance indicators of conventional ML models at Palampur

| RANK | MODEL | GPI    | d     | MBE   | RMSE  | R <sup>2</sup> | MODEL | GPI    | d     | MBE   | RMSE  | R <sup>2</sup> | MODEL | GPI    | d     | MBE   | RMSE  | R <sup>2</sup> |
|------|-------|--------|-------|-------|-------|----------------|-------|--------|-------|-------|-------|----------------|-------|--------|-------|-------|-------|----------------|
| 1    | RF18  | 1.659  | 0.997 | 0.099 | 0.146 | 0.990          | XGB18 | 1.793  | 0.998 | 0.095 | 0.132 | 0.992          | LGB18 | 1.775  | 0.998 | 0.082 | 0.115 | 0.994          |
| 2    | RF17  | 1.598  | 0.997 | 0.112 | 0.159 | 0.988          | XGB17 | 1.784  | 0.998 | 0.096 | 0.134 | 0.991          | LGB17 | 1.750  | 0.998 | 0.087 | 0.120 | 0.993          |
| 3    | RF7   | 0.999  | 0.990 | 0.196 | 0.290 | 0.960          | XGB7  | 1.010  | 0.989 | 0.203 | 0.298 | 0.957          | LGB7  | 0.972  | 0.990 | 0.194 | 0.284 | 0.961          |
| 4    | RF16  | 0.857  | 0.988 | 0.231 | 0.308 | 0.954          | XGB16 | 0.865  | 0.988 | 0.237 | 0.315 | 0.952          | LGB16 | 0.860  | 0.989 | 0.222 | 0.296 | 0.958          |
| 5    | RF8   | 0.630  | 0.984 | 0.255 | 0.353 | 0.940          | XGB8  | 0.599  | 0.983 | 0.261 | 0.365 | 0.936          | LGB8  | 0.586  | 0.985 | 0.249 | 0.346 | 0.942          |
| 6    | RF9   | 0.623  | 0.984 | 0.255 | 0.354 | 0.940          | XGB12 | 0.357  | 0.980 | 0.290 | 0.404 | 0.922          | LGB12 | 0.359  | 0.982 | 0.274 | 0.383 | 0.929          |
| 7    | RF12  | 0.384  | 0.980 | 0.284 | 0.396 | 0.925          | XGB9  | 0.344  | 0.979 | 0.290 | 0.406 | 0.921          | LGB9  | 0.352  | 0.981 | 0.276 | 0.383 | 0.929          |
| 8    | RF14  | 0.307  | 0.979 | 0.297 | 0.407 | 0.920          | XGB14 | 0.281  | 0.979 | 0.304 | 0.413 | 0.918          | LGB14 | 0.282  | 0.981 | 0.288 | 0.392 | 0.926          |
| 9    | RF10  | 0.237  | 0.978 | 0.300 | 0.420 | 0.915          | XGB10 | 0.163  | 0.976 | 0.309 | 0.434 | 0.909          | LGB10 | 0.181  | 0.979 | 0.293 | 0.410 | 0.919          |
| 10   | RF5   | 0.051  | 0.974 | 0.325 | 0.449 | 0.903          | XGB5  | 0.086  | 0.975 | 0.321 | 0.444 | 0.905          | LGB5  | 0.049  | 0.977 | 0.310 | 0.428 | 0.912          |
| 11   | RF15  | 0.049  | 0.975 | 0.333 | 0.445 | 0.905          | XGB15 | -0.018 | 0.973 | 0.339 | 0.457 | 0.900          | LGB15 | -0.019 | 0.976 | 0.325 | 0.435 | 0.909          |
| 12   | RF13  | -0.112 | 0.972 | 0.356 | 0.468 | 0.895          | XGB13 | -0.175 | 0.971 | 0.362 | 0.476 | 0.891          | LGB13 | -0.163 | 0.974 | 0.345 | 0.453 | 0.901          |
| 13   | RF11  | -0.644 | 0.960 | 0.404 | 0.548 | 0.856          | XGB2  | -0.755 | 0.960 | 0.422 | 0.555 | 0.852          | LGB2  | -0.737 | 0.963 | 0.403 | 0.530 | 0.865          |
| 14   | RF2   | -0.804 | 0.958 | 0.431 | 0.568 | 0.846          | XGB11 | -0.799 | 0.958 | 0.411 | 0.566 | 0.847          | LGB11 | -0.747 | 0.962 | 0.393 | 0.535 | 0.862          |
| 15   | RF4   | -0.856 | 0.956 | 0.431 | 0.577 | 0.841          | XGB4  | -0.808 | 0.958 | 0.421 | 0.564 | 0.847          | LGB4  | -0.783 | 0.962 | 0.403 | 0.537 | 0.861          |
| 16   | RF6   | -1.200 | 0.948 | 0.455 | 0.624 | 0.814          | XGB6  | -1.186 | 0.950 | 0.445 | 0.615 | 0.819          | LGB6  | -1.136 | 0.954 | 0.426 | 0.584 | 0.836          |
| 17   | RF3   | -1.436 | 0.943 | 0.491 | 0.650 | 0.798          | XGB3  | -1.333 | 0.947 | 0.473 | 0.627 | 0.812          | LGB3  | -1.355 | 0.951 | 0.458 | 0.605 | 0.824          |
| 18   | RF1   | -2.341 | 0.921 | 0.576 | 0.754 | 0.730          | XGB1  | -2.207 | 0.927 | 0.549 | 0.723 | 0.750          | LGB1  | -2.225 | 0.931 | 0.535 | 0.698 | 0.766          |

**Table S6.** Performance indicators of conventional ML models at Thrissur

| RANK | MODEL | GPI    | d     | MBE   | RMSE  | R <sup>2</sup> | MODEL | GPI    | d     | MBE   | RMSE  | R <sup>2</sup> | MODEL | GPI    | d     | MBE   | RMSE  | R <sup>2</sup> |
|------|-------|--------|-------|-------|-------|----------------|-------|--------|-------|-------|-------|----------------|-------|--------|-------|-------|-------|----------------|
| 1    | RF17  | 1.298  | 0.997 | 0.077 | 0.128 | 0.990          | XGB17 | 1.493  | 0.998 | 0.068 | 0.102 | 0.993          | LGB18 | 1.478  | 0.998 | 0.065 | 0.100 | 0.994          |
| 2    | RF18  | 1.264  | 0.997 | 0.083 | 0.140 | 0.988          | XGB18 | 1.482  | 0.998 | 0.071 | 0.106 | 0.993          | LGB17 | 1.474  | 0.998 | 0.065 | 0.101 | 0.993          |
| 3    | RF8   | 1.088  | 0.993 | 0.117 | 0.200 | 0.974          | XGB8  | 1.223  | 0.994 | 0.116 | 0.193 | 0.976          | LGB16 | 1.220  | 0.995 | 0.121 | 0.173 | 0.981          |
| 4    | RF9   | 1.087  | 0.993 | 0.117 | 0.200 | 0.974          | XGB16 | 1.222  | 0.995 | 0.129 | 0.183 | 0.979          | LGB8  | 1.199  | 0.994 | 0.112 | 0.189 | 0.977          |
| 5    | RF16  | 1.085  | 0.994 | 0.130 | 0.191 | 0.977          | XGB15 | 1.072  | 0.992 | 0.157 | 0.226 | 0.967          | LGB15 | 1.061  | 0.992 | 0.151 | 0.217 | 0.970          |
| 6    | RF15  | 0.969  | 0.992 | 0.156 | 0.225 | 0.967          | XGB7  | 0.584  | 0.978 | 0.217 | 0.362 | 0.916          | LGB7  | 0.578  | 0.980 | 0.208 | 0.347 | 0.923          |
| 7    | RF7   | 0.555  | 0.979 | 0.213 | 0.349 | 0.922          | XGB14 | 0.463  | 0.975 | 0.244 | 0.385 | 0.905          | LGB14 | 0.479  | 0.978 | 0.232 | 0.363 | 0.915          |
| 8    | RF14  | 0.441  | 0.977 | 0.241 | 0.373 | 0.911          | XGB12 | 0.164  | 0.965 | 0.286 | 0.450 | 0.871          | LGB12 | 0.157  | 0.968 | 0.276 | 0.430 | 0.881          |
| 9    | RF12  | 0.162  | 0.967 | 0.281 | 0.439 | 0.876          | XGB9  | 0.123  | 0.964 | 0.295 | 0.456 | 0.867          | LGB9  | 0.129  | 0.967 | 0.281 | 0.435 | 0.879          |
| 10   | RF4   | -0.032 | 0.960 | 0.321 | 0.478 | 0.854          | XGB4  | -0.001 | 0.960 | 0.316 | 0.479 | 0.853          | LGB4  | 0.038  | 0.964 | 0.298 | 0.450 | 0.870          |
| 11   | RF11  | -0.211 | 0.955 | 0.375 | 0.501 | 0.839          | XGB11 | -0.235 | 0.954 | 0.381 | 0.510 | 0.833          | LGB11 | -0.205 | 0.959 | 0.360 | 0.483 | 0.850          |
| 12   | RF13  | -0.225 | 0.954 | 0.376 | 0.505 | 0.837          | XGB5  | -0.242 | 0.951 | 0.348 | 0.525 | 0.824          | LGB13 | -0.229 | 0.958 | 0.361 | 0.488 | 0.847          |
| 13   | RF5   | -0.243 | 0.951 | 0.349 | 0.522 | 0.826          | XGB13 | -0.251 | 0.954 | 0.382 | 0.514 | 0.831          | LGB5  | -0.236 | 0.955 | 0.333 | 0.501 | 0.839          |
| 14   | RF3   | -0.427 | 0.947 | 0.411 | 0.544 | 0.811          | XGB3  | -0.413 | 0.948 | 0.409 | 0.543 | 0.812          | LGB3  | -0.396 | 0.953 | 0.389 | 0.515 | 0.830          |
| 15   | RF10  | -0.902 | 0.925 | 0.474 | 0.631 | 0.745          | XGB10 | -0.962 | 0.925 | 0.476 | 0.637 | 0.742          | LGB10 | -0.951 | 0.931 | 0.455 | 0.608 | 0.763          |
| 16   | RF2   | -1.136 | 0.915 | 0.507 | 0.672 | 0.712          | XGB2  | -1.114 | 0.918 | 0.498 | 0.660 | 0.723          | LGB2  | -1.121 | 0.924 | 0.479 | 0.633 | 0.744          |
| 17   | RF6   | -2.069 | 0.864 | 0.613 | 0.822 | 0.576          | XGB6  | -2.101 | 0.870 | 0.602 | 0.807 | 0.591          | LGB6  | -2.153 | 0.876 | 0.579 | 0.779 | 0.613          |
| 18   | RF1   | -2.702 | 0.829 | 0.690 | 0.919 | 0.487          | XGB1  | -2.507 | 0.846 | 0.643 | 0.855 | 0.539          | LGB1  | -2.522 | 0.855 | 0.614 | 0.821 | 0.569          |



**Table S7.** Performance indicators of conventional ML models at Faizabad

| RANK | MODEL | GPI    | d     | MBE   | RMSE  | R <sup>2</sup> | MODEL | GPI    | d     | MBE   | RMSE  | R <sup>2</sup> | MODEL | GPI    | d     | MBE   | RMSE  | R <sup>2</sup> |
|------|-------|--------|-------|-------|-------|----------------|-------|--------|-------|-------|-------|----------------|-------|--------|-------|-------|-------|----------------|
| 1    | RF17  | 1.816  | 0.997 | 0.150 | 0.233 | 0.990          | XGB17 | 2.087  | 0.998 | 0.134 | 0.203 | 0.992          | LGB17 | 2.115  | 0.998 | 0.120 | 0.191 | 0.993          |
| 2    | RF18  | 1.806  | 0.997 | 0.148 | 0.242 | 0.989          | XGB18 | 2.067  | 0.998 | 0.141 | 0.210 | 0.991          | LGB18 | 2.097  | 0.998 | 0.122 | 0.201 | 0.992          |
| 3    | RF9   | 1.437  | 0.993 | 0.243 | 0.380 | 0.972          | XGB16 | 1.643  | 0.994 | 0.267 | 0.357 | 0.975          | LGB16 | 1.665  | 0.994 | 0.250 | 0.342 | 0.977          |
| 4    | RF8   | 1.428  | 0.992 | 0.245 | 0.384 | 0.971          | XGB8  | 1.594  | 0.992 | 0.253 | 0.392 | 0.970          | LGB8  | 1.603  | 0.993 | 0.242 | 0.377 | 0.972          |
| 5    | RF16  | 1.392  | 0.993 | 0.273 | 0.383 | 0.971          | XGB15 | 1.300  | 0.989 | 0.341 | 0.474 | 0.956          | LGB15 | 1.316  | 0.989 | 0.325 | 0.454 | 0.959          |
| 6    | RF15  | 1.104  | 0.988 | 0.342 | 0.479 | 0.955          | XGB13 | 1.105  | 0.986 | 0.398 | 0.526 | 0.946          | LGB13 | 1.114  | 0.987 | 0.380 | 0.507 | 0.949          |
| 7    | RF13  | 0.949  | 0.986 | 0.388 | 0.520 | 0.947          | XGB11 | 0.951  | 0.982 | 0.404 | 0.585 | 0.933          | LGB11 | 0.968  | 0.984 | 0.387 | 0.560 | 0.938          |
| 8    | RF11  | 0.818  | 0.983 | 0.396 | 0.572 | 0.936          | XGB3  | 0.686  | 0.978 | 0.474 | 0.649 | 0.917          | LGB3  | 0.716  | 0.980 | 0.452 | 0.618 | 0.925          |
| 9    | RF3   | 0.521  | 0.978 | 0.474 | 0.648 | 0.917          | XGB7  | -0.631 | 0.946 | 0.641 | 0.986 | 0.810          | LGB7  | -0.603 | 0.951 | 0.617 | 0.941 | 0.826          |
| 10   | RF7   | -0.593 | 0.951 | 0.621 | 0.944 | 0.825          | XGB9  | -0.806 | 0.943 | 0.688 | 1.016 | 0.798          | LGB9  | -0.822 | 0.947 | 0.664 | 0.978 | 0.812          |
| 11   | RF12  | -0.916 | 0.943 | 0.685 | 1.012 | 0.799          | XGB12 | -0.835 | 0.942 | 0.687 | 1.025 | 0.795          | LGB12 | -0.859 | 0.946 | 0.664 | 0.989 | 0.808          |
| 12   | RF10  | -0.921 | 0.944 | 0.701 | 1.007 | 0.801          | XGB5  | -0.887 | 0.941 | 0.703 | 1.030 | 0.792          | LGB5  | -0.925 | 0.944 | 0.679 | 0.999 | 0.804          |
| 13   | RF5   | -0.990 | 0.941 | 0.704 | 1.024 | 0.794          | XGB10 | -0.917 | 0.941 | 0.715 | 1.036 | 0.791          | LGB10 | -0.960 | 0.944 | 0.693 | 1.004 | 0.802          |
| 14   | RF14  | -1.076 | 0.939 | 0.723 | 1.038 | 0.788          | XGB14 | -1.048 | 0.937 | 0.734 | 1.062 | 0.780          | LGB14 | -1.088 | 0.941 | 0.712 | 1.026 | 0.793          |
| 15   | RF4   | -1.471 | 0.929 | 0.799 | 1.116 | 0.757          | XGB6  | -1.436 | 0.928 | 0.799 | 1.140 | 0.749          | LGB4  | -1.406 | 0.933 | 0.771 | 1.079 | 0.771          |
| 16   | RF6   | -1.556 | 0.927 | 0.808 | 1.138 | 0.749          | XGB4  | -1.443 | 0.928 | 0.805 | 1.138 | 0.749          | LGB6  | -1.507 | 0.931 | 0.780 | 1.103 | 0.762          |
| 17   | RF2   | -1.568 | 0.926 | 0.819 | 1.131 | 0.749          | XGB2  | -1.516 | 0.925 | 0.817 | 1.145 | 0.744          | LGB2  | -1.541 | 0.930 | 0.788 | 1.104 | 0.760          |
| 18   | RF1   | -2.181 | 0.910 | 0.915 | 1.253 | 0.697          | XGB1  | -1.913 | 0.915 | 0.881 | 1.221 | 0.712          | LGB1  | -1.885 | 0.921 | 0.845 | 1.161 | 0.736          |

**Table S8.** Performance indicators of conventional ML models at Jabalpur

| RANK | MODEL | GPI    | d     | MBE   | RMSE  | R <sup>2</sup> | MODEL | GPI    | d     | MBE   | RMSE  | R <sup>2</sup> | MODEL | GPI    | d     | MBE   | RMSE  | R <sup>2</sup> |
|------|-------|--------|-------|-------|-------|----------------|-------|--------|-------|-------|-------|----------------|-------|--------|-------|-------|-------|----------------|
| 1    | RF17  | 1.705  | 0.998 | 0.105 | 0.163 | 0.991          | XGB18 | 1.981  | 0.998 | 0.097 | 0.143 | 0.993          | LGB18 | 2.004  | 0.999 | 0.085 | 0.128 | 0.995          |
| 2    | RF18  | 1.693  | 0.998 | 0.104 | 0.169 | 0.991          | XGB17 | 1.979  | 0.998 | 0.098 | 0.143 | 0.993          | LGB17 | 1.981  | 0.999 | 0.089 | 0.134 | 0.994          |
| 3    | RF16  | 1.289  | 0.995 | 0.179 | 0.251 | 0.979          | XGB16 | 1.511  | 0.995 | 0.178 | 0.241 | 0.981          | LGB16 | 1.517  | 0.996 | 0.167 | 0.226 | 0.983          |
| 4    | RF8   | 1.254  | 0.994 | 0.169 | 0.269 | 0.977          | XGB8  | 1.392  | 0.994 | 0.177 | 0.276 | 0.975          | LGB8  | 1.389  | 0.994 | 0.166 | 0.262 | 0.978          |
| 5    | RF9   | 1.254  | 0.994 | 0.168 | 0.269 | 0.976          | XGB15 | 1.023  | 0.991 | 0.240 | 0.337 | 0.963          | LGB15 | 1.035  | 0.992 | 0.226 | 0.317 | 0.967          |
| 6    | RF15  | 0.893  | 0.991 | 0.235 | 0.330 | 0.964          | XGB13 | 0.157  | 0.981 | 0.353 | 0.473 | 0.927          | LGB13 | 0.127  | 0.982 | 0.338 | 0.454 | 0.933          |
| 7    | RF11  | 0.056  | 0.980 | 0.319 | 0.484 | 0.924          | XGB11 | 0.101  | 0.979 | 0.328 | 0.495 | 0.920          | LGB11 | 0.092  | 0.981 | 0.312 | 0.471 | 0.928          |
| 8    | RF13  | 0.054  | 0.981 | 0.351 | 0.470 | 0.928          | XGB7  | -0.052 | 0.977 | 0.339 | 0.519 | 0.912          | LGB12 | -0.065 | 0.979 | 0.328 | 0.492 | 0.921          |
| 9    | RF7   | -0.055 | 0.978 | 0.330 | 0.501 | 0.918          | XGB12 | -0.092 | 0.976 | 0.347 | 0.524 | 0.911          | LGB7  | -0.081 | 0.979 | 0.327 | 0.496 | 0.920          |
| 10   | RF12  | -0.057 | 0.978 | 0.334 | 0.499 | 0.919          | XGB9  | -0.109 | 0.976 | 0.348 | 0.526 | 0.910          | LGB9  | -0.117 | 0.978 | 0.334 | 0.499 | 0.919          |
| 11   | RF5   | -0.272 | 0.976 | 0.365 | 0.529 | 0.909          | XGB5  | -0.226 | 0.975 | 0.366 | 0.539 | 0.905          | LGB5  | -0.251 | 0.977 | 0.351 | 0.515 | 0.914          |
| 12   | RF14  | -0.426 | 0.974 | 0.386 | 0.550 | 0.901          | XGB14 | -0.437 | 0.972 | 0.395 | 0.566 | 0.896          | LGB3  | -0.466 | 0.975 | 0.395 | 0.535 | 0.907          |
| 13   | RF3   | -0.539 | 0.973 | 0.415 | 0.561 | 0.898          | XGB3  | -0.453 | 0.973 | 0.415 | 0.562 | 0.897          | LGB14 | -0.472 | 0.975 | 0.379 | 0.542 | 0.904          |
| 14   | RF4   | -0.720 | 0.970 | 0.427 | 0.588 | 0.887          | XGB4  | -0.677 | 0.969 | 0.426 | 0.595 | 0.885          | LGB4  | -0.686 | 0.972 | 0.408 | 0.565 | 0.896          |
| 15   | RF10  | -0.935 | 0.965 | 0.424 | 0.626 | 0.873          | XGB10 | -1.044 | 0.963 | 0.438 | 0.649 | 0.863          | LGB10 | -1.054 | 0.966 | 0.418 | 0.618 | 0.876          |
| 16   | RF6   | -1.302 | 0.960 | 0.462 | 0.673 | 0.853          | XGB6  | -1.369 | 0.958 | 0.468 | 0.688 | 0.846          | LGB6  | -1.325 | 0.962 | 0.444 | 0.648 | 0.863          |
| 17   | RF2   | -1.602 | 0.956 | 0.516 | 0.702 | 0.840          | XGB2  | -1.667 | 0.954 | 0.521 | 0.715 | 0.834          | LGB2  | -1.635 | 0.959 | 0.494 | 0.674 | 0.852          |
| 18   | RF1   | -2.292 | 0.944 | 0.588 | 0.783 | 0.802          | XGB1  | -2.018 | 0.949 | 0.556 | 0.752 | 0.816          | LGB1  | -1.996 | 0.954 | 0.529 | 0.711 | 0.835          |

**Table S9.** Performance indicators of conventional ML models at Raipur

| RANK | MODEL | GPI    | d     | MBE   | RMSE  | R <sup>2</sup> | MODEL | GPI    | d     | MBE   | RMSE  | R <sup>2</sup> | MODEL | GPI    | d     | MBE   | RMSE  | R <sup>2</sup> |
|------|-------|--------|-------|-------|-------|----------------|-------|--------|-------|-------|-------|----------------|-------|--------|-------|-------|-------|----------------|
| 1    | RF17  | 1.853  | 0.997 | 0.109 | 0.187 | 0.990          | XGB18 | 2.156  | 0.998 | 0.105 | 0.164 | 0.992          | LGB18 | 2.150  | 0.998 | 0.093 | 0.161 | 0.992          |
| 2    | RF18  | 1.827  | 0.997 | 0.113 | 0.195 | 0.989          | XGB17 | 2.154  | 0.998 | 0.105 | 0.165 | 0.992          | LGB17 | 2.140  | 0.998 | 0.097 | 0.161 | 0.992          |
| 3    | RF16  | 1.512  | 0.995 | 0.175 | 0.260 | 0.980          | XGB16 | 1.764  | 0.995 | 0.175 | 0.251 | 0.982          | LGB16 | 1.772  | 0.996 | 0.163 | 0.237 | 0.984          |
| 4    | RF9   | 1.366  | 0.993 | 0.182 | 0.302 | 0.973          | XGB8  | 1.554  | 0.993 | 0.190 | 0.306 | 0.973          | LGB8  | 1.533  | 0.993 | 0.182 | 0.295 | 0.974          |
| 5    | RF8   | 1.362  | 0.993 | 0.182 | 0.303 | 0.973          | XGB15 | 1.268  | 0.991 | 0.243 | 0.355 | 0.963          | LGB15 | 1.283  | 0.992 | 0.230 | 0.334 | 0.967          |
| 6    | RF15  | 1.096  | 0.991 | 0.237 | 0.348 | 0.965          | XGB13 | 0.488  | 0.982 | 0.356 | 0.485 | 0.931          | LGB13 | 0.469  | 0.983 | 0.342 | 0.466 | 0.936          |
| 7    | RF13  | 0.344  | 0.982 | 0.351 | 0.479 | 0.933          | XGB11 | 0.375  | 0.980 | 0.346 | 0.513 | 0.923          | LGB11 | 0.369  | 0.981 | 0.333 | 0.490 | 0.930          |
| 8    | RF11  | 0.257  | 0.980 | 0.341 | 0.503 | 0.926          | XGB3  | -0.108 | 0.974 | 0.417 | 0.579 | 0.902          | LGB3  | -0.068 | 0.977 | 0.396 | 0.548 | 0.912          |
| 9    | RF3   | -0.218 | 0.975 | 0.417 | 0.571 | 0.904          | XGB7  | -0.419 | 0.968 | 0.399 | 0.646 | 0.879          | LGB7  | -0.434 | 0.970 | 0.383 | 0.617 | 0.889          |
| 10   | RF7   | -0.381 | 0.970 | 0.384 | 0.616 | 0.889          | XGB12 | -0.423 | 0.968 | 0.409 | 0.643 | 0.880          | LGB12 | -0.444 | 0.970 | 0.392 | 0.616 | 0.889          |
| 11   | RF12  | -0.418 | 0.970 | 0.398 | 0.618 | 0.888          | XGB9  | -0.573 | 0.966 | 0.421 | 0.664 | 0.872          | LGB9  | -0.506 | 0.969 | 0.401 | 0.623 | 0.886          |
| 12   | RF14  | -0.640 | 0.967 | 0.430 | 0.647 | 0.878          | XGB14 | -0.640 | 0.965 | 0.440 | 0.668 | 0.870          | LGB5  | -0.645 | 0.968 | 0.417 | 0.640 | 0.880          |
| 13   | RF5   | -0.658 | 0.967 | 0.430 | 0.650 | 0.876          | XGB5  | -0.700 | 0.964 | 0.437 | 0.681 | 0.866          | LGB14 | -0.693 | 0.967 | 0.425 | 0.645 | 0.878          |
| 14   | RF4   | -1.006 | 0.962 | 0.485 | 0.692 | 0.860          | XGB4  | -0.989 | 0.960 | 0.485 | 0.711 | 0.853          | LGB4  | -0.962 | 0.964 | 0.463 | 0.674 | 0.867          |
| 15   | RF10  | -1.152 | 0.959 | 0.486 | 0.717 | 0.850          | XGB10 | -1.207 | 0.956 | 0.496 | 0.742 | 0.840          | LGB10 | -1.164 | 0.960 | 0.473 | 0.702 | 0.856          |
| 16   | RF6   | -1.479 | 0.954 | 0.527 | 0.756 | 0.833          | XGB6  | -1.385 | 0.954 | 0.525 | 0.759 | 0.832          | LGB6  | -1.395 | 0.957 | 0.502 | 0.726 | 0.846          |
| 17   | RF2   | -1.518 | 0.954 | 0.543 | 0.758 | 0.832          | XGB2  | -1.471 | 0.953 | 0.542 | 0.766 | 0.829          | LGB2  | -1.553 | 0.955 | 0.524 | 0.742 | 0.839          |
| 18   | RF1   | -2.147 | 0.943 | 0.611 | 0.835 | 0.798          | XGB1  | -1.844 | 0.946 | 0.582 | 0.808 | 0.810          | LGB1  | -1.850 | 0.951 | 0.560 | 0.772 | 0.826          |

**Table S10.** Performance indicators of conventional ML models at Ranchi

| RANK | MODEL | GPI    | d     | MBE   | RMSE  | R <sup>2</sup> | MODEL | GPI    | d     | MBE   | RMSE  | R <sup>2</sup> | MODEL | GPI    | d     | MBE   | RMSE  | R <sup>2</sup> |
|------|-------|--------|-------|-------|-------|----------------|-------|--------|-------|-------|-------|----------------|-------|--------|-------|-------|-------|----------------|
| 1    | RF17  | 1.764  | 0.996 | 0.107 | 0.164 | 0.984          | XGB17 | 2.003  | 0.998 | 0.087 | 0.124 | 0.991          | LGB17 | 1.991  | 0.998 | 0.081 | 0.123 | 0.991          |
| 2    | RF18  | 1.737  | 0.995 | 0.109 | 0.172 | 0.983          | XGB18 | 1.987  | 0.997 | 0.088 | 0.130 | 0.990          | LGB18 | 1.965  | 0.997 | 0.082 | 0.132 | 0.990          |
| 3    | RF8   | 1.489  | 0.992 | 0.149 | 0.223 | 0.970          | XGB8  | 1.557  | 0.992 | 0.152 | 0.225 | 0.970          | LGB8  | 1.564  | 0.993 | 0.144 | 0.213 | 0.973          |
| 4    | RF9   | 1.484  | 0.992 | 0.149 | 0.225 | 0.970          | XGB16 | 1.264  | 0.988 | 0.203 | 0.276 | 0.955          | LGB16 | 1.260  | 0.989 | 0.192 | 0.264 | 0.959          |
| 5    | RF16  | 1.142  | 0.987 | 0.208 | 0.284 | 0.952          | XGB15 | 1.020  | 0.984 | 0.237 | 0.319 | 0.940          | LGB15 | 1.004  | 0.986 | 0.226 | 0.306 | 0.944          |
| 6    | RF15  | 0.950  | 0.984 | 0.236 | 0.318 | 0.940          | XGB12 | 0.715  | 0.977 | 0.251 | 0.381 | 0.914          | LGB12 | 0.733  | 0.980 | 0.237 | 0.360 | 0.923          |
| 7    | RF12  | 0.700  | 0.978 | 0.246 | 0.372 | 0.918          | XGB9  | 0.660  | 0.976 | 0.255 | 0.391 | 0.910          | LGB9  | 0.680  | 0.979 | 0.243 | 0.368 | 0.920          |
| 8    | RF7   | 0.608  | 0.977 | 0.260 | 0.386 | 0.912          | XGB7  | 0.621  | 0.976 | 0.264 | 0.395 | 0.908          | LGB7  | 0.606  | 0.978 | 0.252 | 0.379 | 0.915          |
| 9    | RF5   | 0.534  | 0.975 | 0.271 | 0.396 | 0.907          | XGB5  | 0.584  | 0.975 | 0.272 | 0.399 | 0.906          | LGB5  | 0.569  | 0.977 | 0.261 | 0.382 | 0.913          |
| 10   | RF14  | 0.105  | 0.967 | 0.333 | 0.456 | 0.877          | XGB14 | 0.118  | 0.966 | 0.337 | 0.463 | 0.874          | LGB14 | 0.085  | 0.968 | 0.324 | 0.445 | 0.883          |
| 11   | RF4   | -0.011 | 0.964 | 0.348 | 0.472 | 0.868          | XGB4  | 0.052  | 0.965 | 0.346 | 0.471 | 0.869          | LGB4  | 0.062  | 0.968 | 0.329 | 0.447 | 0.882          |
| 12   | RF11  | -0.892 | 0.941 | 0.429 | 0.591 | 0.793          | XGB11 | -0.963 | 0.939 | 0.437 | 0.605 | 0.784          | LGB11 | -0.956 | 0.944 | 0.416 | 0.575 | 0.804          |
| 13   | RF13  | -0.991 | 0.939 | 0.448 | 0.600 | 0.787          | XGB13 | -1.056 | 0.937 | 0.457 | 0.612 | 0.779          | LGB13 | -1.011 | 0.943 | 0.431 | 0.578 | 0.802          |
| 14   | RF3   | -1.272 | 0.931 | 0.478 | 0.633 | 0.763          | XGB3  | -1.276 | 0.931 | 0.478 | 0.637 | 0.761          | LGB3  | -1.272 | 0.937 | 0.456 | 0.605 | 0.783          |
| 15   | RF10  | -1.552 | 0.923 | 0.494 | 0.671 | 0.736          | XGB6  | -1.664 | 0.920 | 0.506 | 0.685 | 0.726          | LGB6  | -1.628 | 0.927 | 0.478 | 0.646 | 0.753          |
| 16   | RF6   | -1.612 | 0.921 | 0.503 | 0.676 | 0.731          | XGB10 | -1.686 | 0.919 | 0.506 | 0.690 | 0.723          | LGB10 | -1.653 | 0.927 | 0.478 | 0.652 | 0.750          |
| 17   | RF2   | -1.948 | 0.912 | 0.541 | 0.711 | 0.703          | XGB1  | -1.938 | 0.912 | 0.540 | 0.708 | 0.706          | LGB1  | -1.993 | 0.918 | 0.518 | 0.679 | 0.727          |
| 18   | RF1   | -2.236 | 0.904 | 0.572 | 0.744 | 0.679          | XGB2  | -1.997 | 0.911 | 0.544 | 0.717 | 0.700          | LGB2  | -2.006 | 0.918 | 0.519 | 0.683 | 0.725          |

**Table S11.** Performance indicators of conventional ML models at Ranichauri

| RANK | MODEL | GPI    | d     | MBE   | RMSE  | R <sup>2</sup> | MODEL | GPI    | d     | MBE   | RMSE  | R <sup>2</sup> | MODEL | GPI    | d     | MBE   | RMSE  | R <sup>2</sup> |
|------|-------|--------|-------|-------|-------|----------------|-------|--------|-------|-------|-------|----------------|-------|--------|-------|-------|-------|----------------|
| 1    | RF18  | 1.446  | 0.997 | 0.084 | 0.127 | 0.989          | XGB17 | 1.674  | 0.998 | 0.072 | 0.102 | 0.993          | LGB17 | 1.669  | 0.999 | 0.066 | 0.094 | 0.994          |
| 2    | RF17  | 1.411  | 0.997 | 0.091 | 0.133 | 0.988          | XGB18 | 1.634  | 0.998 | 0.077 | 0.110 | 0.992          | LGB18 | 1.652  | 0.998 | 0.067 | 0.098 | 0.994          |
| 3    | RF7   | 1.099  | 0.994 | 0.135 | 0.191 | 0.976          | XGB7  | 1.176  | 0.994 | 0.137 | 0.193 | 0.975          | LGB7  | 1.167  | 0.994 | 0.129 | 0.183 | 0.978          |
| 4    | RF9   | 0.837  | 0.991 | 0.173 | 0.233 | 0.964          | XGB9  | 0.887  | 0.990 | 0.176 | 0.237 | 0.963          | LGB8  | 0.863  | 0.991 | 0.168 | 0.227 | 0.966          |
| 5    | RF8   | 0.832  | 0.991 | 0.174 | 0.234 | 0.964          | XGB8  | 0.887  | 0.990 | 0.174 | 0.237 | 0.962          | LGB9  | 0.862  | 0.991 | 0.169 | 0.227 | 0.966          |
| 6    | RF12  | 0.825  | 0.991 | 0.175 | 0.235 | 0.963          | XGB12 | 0.853  | 0.990 | 0.181 | 0.241 | 0.961          | LGB12 | 0.846  | 0.991 | 0.171 | 0.229 | 0.965          |
| 7    | RF5   | 0.700  | 0.989 | 0.192 | 0.254 | 0.957          | XGB5  | 0.760  | 0.989 | 0.192 | 0.255 | 0.957          | LGB5  | 0.740  | 0.990 | 0.183 | 0.244 | 0.960          |
| 8    | RF16  | 0.480  | 0.985 | 0.211 | 0.291 | 0.944          | XGB16 | 0.475  | 0.985 | 0.216 | 0.298 | 0.941          | LGB16 | 0.480  | 0.986 | 0.204 | 0.283 | 0.947          |
| 9    | RF14  | 0.263  | 0.982 | 0.235 | 0.323 | 0.931          | XGB14 | 0.214  | 0.981 | 0.243 | 0.333 | 0.926          | LGB14 | 0.211  | 0.983 | 0.231 | 0.317 | 0.933          |
| 10   | RF15  | 0.056  | 0.978 | 0.262 | 0.350 | 0.919          | XGB15 | 0.030  | 0.978 | 0.264 | 0.355 | 0.916          | LGB15 | 0.016  | 0.980 | 0.253 | 0.339 | 0.924          |
| 11   | RF10  | -0.081 | 0.975 | 0.263 | 0.374 | 0.907          | XGB10 | -0.191 | 0.974 | 0.270 | 0.388 | 0.900          | LGB10 | -0.182 | 0.976 | 0.258 | 0.368 | 0.910          |
| 12   | RF4   | -0.186 | 0.974 | 0.288 | 0.382 | 0.903          | XGB4  | -0.213 | 0.974 | 0.290 | 0.384 | 0.902          | LGB4  | -0.216 | 0.976 | 0.277 | 0.365 | 0.911          |
| 13   | RF11  | -0.475 | 0.968 | 0.307 | 0.421 | 0.882          | XGB11 | -0.662 | 0.966 | 0.318 | 0.440 | 0.872          | LGB11 | -0.646 | 0.969 | 0.302 | 0.417 | 0.884          |
| 14   | RF13  | -0.773 | 0.963 | 0.344 | 0.453 | 0.863          | XGB13 | -0.922 | 0.961 | 0.352 | 0.464 | 0.858          | LGB13 | -0.890 | 0.965 | 0.333 | 0.439 | 0.872          |
| 15   | RF6   | -0.897 | 0.960 | 0.347 | 0.471 | 0.852          | XGB6  | -1.010 | 0.959 | 0.349 | 0.476 | 0.850          | LGB6  | -1.008 | 0.963 | 0.333 | 0.453 | 0.863          |
| 16   | RF2   | -1.228 | 0.953 | 0.388 | 0.504 | 0.831          | XGB2  | -1.366 | 0.953 | 0.389 | 0.509 | 0.829          | LGB2  | -1.341 | 0.957 | 0.371 | 0.482 | 0.845          |
| 17   | RF3   | -1.756 | 0.941 | 0.431 | 0.560 | 0.792          | XGB3  | -1.900 | 0.941 | 0.430 | 0.559 | 0.793          | LGB3  | -1.890 | 0.947 | 0.410 | 0.533 | 0.811          |
| 18   | RF1   | -2.554 | 0.923 | 0.496 | 0.641 | 0.732          | XGB1  | -2.326 | 0.932 | 0.465 | 0.596 | 0.765          | LGB1  | -2.331 | 0.938 | 0.446 | 0.569 | 0.785          |

**Table S12.** Performance indicators of conventional ML models at Samastipur

| RANK | MODEL | GPI    | d     | MBE   | RMSE  | R <sup>2</sup> | MODEL | GPI    | d     | MBE   | RMSE  | R <sup>2</sup> | MODEL | GPI    | d     | MBE   | RMSE  | R <sup>2</sup> |
|------|-------|--------|-------|-------|-------|----------------|-------|--------|-------|-------|-------|----------------|-------|--------|-------|-------|-------|----------------|
| 1    | RF17  | 1.470  | 0.997 | 0.115 | 0.179 | 0.987          | XGB17 | 1.670  | 0.998 | 0.098 | 0.142 | 0.992          | LGB17 | 1.653  | 0.998 | 0.088 | 0.129 | 0.993          |
| 2    | RF18  | 1.382  | 0.995 | 0.122 | 0.216 | 0.982          | XGB18 | 1.620  | 0.997 | 0.108 | 0.160 | 0.990          | LGB18 | 1.627  | 0.998 | 0.091 | 0.139 | 0.992          |
| 3    | RF9   | 1.144  | 0.992 | 0.187 | 0.275 | 0.970          | XGB8  | 1.207  | 0.992 | 0.194 | 0.281 | 0.968          | LGB8  | 1.190  | 0.993 | 0.183 | 0.263 | 0.972          |
| 4    | RF8   | 1.142  | 0.992 | 0.188 | 0.275 | 0.970          | XGB16 | 0.974  | 0.988 | 0.237 | 0.343 | 0.953          | LGB16 | 0.959  | 0.989 | 0.223 | 0.323 | 0.958          |
| 5    | RF16  | 0.928  | 0.988 | 0.231 | 0.332 | 0.956          | XGB7  | 0.824  | 0.985 | 0.264 | 0.379 | 0.942          | LGB7  | 0.797  | 0.986 | 0.251 | 0.362 | 0.948          |
| 6    | RF7   | 0.784  | 0.986 | 0.256 | 0.371 | 0.945          | XGB12 | 0.682  | 0.982 | 0.288 | 0.413 | 0.932          | LGB15 | 0.663  | 0.984 | 0.282 | 0.388 | 0.940          |
| 7    | RF15  | 0.647  | 0.983 | 0.289 | 0.400 | 0.936          | XGB15 | 0.668  | 0.982 | 0.297 | 0.413 | 0.932          | LGB12 | 0.641  | 0.983 | 0.275 | 0.398 | 0.937          |
| 8    | RF12  | 0.559  | 0.981 | 0.291 | 0.428 | 0.927          | XGB9  | 0.665  | 0.982 | 0.295 | 0.415 | 0.931          | LGB9  | 0.638  | 0.983 | 0.277 | 0.398 | 0.937          |
| 9    | RF5   | 0.482  | 0.980 | 0.317 | 0.440 | 0.922          | XGB5  | 0.537  | 0.979 | 0.318 | 0.443 | 0.922          | LGB5  | 0.517  | 0.981 | 0.302 | 0.422 | 0.929          |
| 10   | RF14  | 0.128  | 0.971 | 0.378 | 0.517 | 0.893          | XGB14 | 0.105  | 0.970 | 0.391 | 0.533 | 0.887          | LGB14 | 0.088  | 0.973 | 0.373 | 0.508 | 0.897          |
| 11   | RF4   | -0.290 | 0.961 | 0.449 | 0.600 | 0.856          | XGB4  | -0.285 | 0.960 | 0.455 | 0.606 | 0.854          | LGB4  | -0.257 | 0.965 | 0.429 | 0.569 | 0.870          |
| 12   | RF13  | -0.394 | 0.957 | 0.454 | 0.624 | 0.844          | XGB13 | -0.509 | 0.953 | 0.473 | 0.653 | 0.830          | LGB13 | -0.492 | 0.958 | 0.447 | 0.618 | 0.847          |
| 13   | RF10  | -0.608 | 0.950 | 0.469 | 0.669 | 0.821          | XGB10 | -0.690 | 0.947 | 0.482 | 0.690 | 0.811          | LGB10 | -0.671 | 0.952 | 0.457 | 0.653 | 0.829          |
| 14   | RF11  | -0.737 | 0.946 | 0.490 | 0.691 | 0.809          | XGB11 | -0.859 | 0.942 | 0.506 | 0.718 | 0.795          | LGB11 | -0.815 | 0.949 | 0.479 | 0.674 | 0.818          |
| 15   | RF3   | -1.150 | 0.934 | 0.557 | 0.759 | 0.770          | XGB3  | -1.241 | 0.932 | 0.567 | 0.777 | 0.761          | LGB3  | -1.203 | 0.939 | 0.537 | 0.733 | 0.785          |
| 16   | RF2   | -1.362 | 0.928 | 0.593 | 0.792 | 0.750          | XGB2  | -1.433 | 0.926 | 0.596 | 0.804 | 0.744          | LGB2  | -1.397 | 0.933 | 0.566 | 0.760 | 0.769          |
| 17   | RF6   | -1.596 | 0.918 | 0.597 | 0.837 | 0.721          | XGB6  | -1.603 | 0.919 | 0.595 | 0.838 | 0.723          | LGB6  | -1.591 | 0.926 | 0.567 | 0.795 | 0.747          |
| 18   | RF1   | -2.530 | 0.886 | 0.737 | 0.973 | 0.631          | XGB1  | -2.330 | 0.895 | 0.704 | 0.931 | 0.657          | LGB1  | -2.347 | 0.903 | 0.676 | 0.889 | 0.684          |

**Table S13.** Best hyper parameters in RF models at humid stations

|      | Jorhat           |                      |               | Mohanpur         |                      |               | Palampur         |                      |               | Thrissur         |                      |               |
|------|------------------|----------------------|---------------|------------------|----------------------|---------------|------------------|----------------------|---------------|------------------|----------------------|---------------|
|      | n_estimat<br>ors | min_samples_<br>leaf | max_de<br>pth |
| RF1  | 110              | 1                    | 6             | 240              | 1                    | 6             | 230              | 5                    | 6             | 70               | 5                    | 6             |
| RF2  | 330              | 5                    | 8             | 100              | 1                    | 8             | 380              | 5                    | 8             | 440              | 5                    | 8             |
| RF3  | 250              | 1                    | 6             | 250              | 3                    | 6             | 430              | 5                    | 8             | 50               | 5                    | 8             |
| RF4  | 180              | 5                    | 8             | 270              | 1                    | 8             | 430              | 5                    | 10            | 350              | 5                    | 6             |
| RF5  | 270              | 5                    | 8             | 160              | 5                    | 12            | 70               | 5                    | 10            | 140              | 5                    | 6             |
| RF6  | 170              | 3                    | 6             | 180              | 5                    | 8             | 400              | 5                    | 8             | 480              | 5                    | 8             |
| RF7  | 230              | 5                    | 12            | 320              | 3                    | None          | 420              | 3                    | 16            | 330              | 5                    | 10            |
| RF8  | 280              | 1                    | 16            | 430              | 1                    | 14            | 430              | 5                    | 12            | 480              | 1                    | 14            |
| RF9  | 270              | 5                    | 16            | 350              | 3                    | 18            | 150              | 5                    | 14            | 440              | 5                    | 10            |
| RF10 | 130              | 5                    | 8             | 170              | 1                    | 8             | 150              | 5                    | 10            | 380              | 5                    | 8             |
| RF11 | 400              | 1                    | 8             | 250              | 1                    | 8             | 380              | 5                    | 10            | 240              | 3                    | 10            |
| RF12 | 130              | 5                    | 18            | 90               | 3                    | None          | 160              | 5                    | 16            | 270              | 5                    | 12            |
| RF13 | 330              | 5                    | 10            | 470              | 1                    | 8             | 370              | 5                    | 10            | 110              | 3                    | 10            |
| RF14 | 390              | 3                    | 10            | 260              | 3                    | 10            | 470              | 3                    | 12            | 450              | 5                    | 10            |
| RF15 | 410              | 1                    | 10            | 490              | 1                    | 10            | 330              | 5                    | 14            | 470              | 1                    | 12            |
| RF16 | 280              | 1                    | 18            | 420              | 1                    | 12            | 280              | 1                    | 16            | 470              | 1                    | None          |
| RF17 | 380              | 1                    | 18            | 330              | 1                    | None          | 470              | 1                    | None          | 320              | 1                    | 16            |
| RF18 | 160              | 1                    | 18            | 350              | 1                    | 18            | 350              | 1                    | 18            | 410              | 1                    | 18            |

**Table S14.** Best hyper parameters in XGB models at humid stations

|       | Jorhat       |               |           | Mohanpur     |               |           | Palampur     |               |           | Thrissur     |               |           |
|-------|--------------|---------------|-----------|--------------|---------------|-----------|--------------|---------------|-----------|--------------|---------------|-----------|
|       | n_estimators | learning_rate | max_depth |
| XGB1  | 150          | 0.05          | 2         | 220          | 0.1           | 2         | 100          | 0.05          | 4         | 50           | 0.3           | 2         |
| XGB2  | 190          | 0.15          | 2         | 180          | 0.05          | 4         | 110          | 0.05          | 4         | 120          | 0.05          | 4         |
| XGB3  | 110          | 0.05          | 4         | 140          | 0.05          | 4         | 110          | 0.05          | 4         | 190          | 0.05          | 4         |
| XGB4  | 80           | 0.1           | 4         | 150          | 0.1           | 4         | 60           | 0.15          | 4         | 110          | 0.05          | 4         |
| XGB5  | 140          | 0.05          | 4         | 60           | 0.1           | 6         | 230          | 0.05          | 4         | 120          | 0.05          | 4         |
| XGB6  | 50           | 0.1           | 4         | 170          | 0.05          | 4         | 230          | 0.05          | 4         | 320          | 0.05          | 4         |
| XGB7  | 160          | 0.05          | 4         | 120          | 0.05          | 6         | 190          | 0.05          | 6         | 420          | 0.15          | 2         |
| XGB8  | 490          | 0.05          | 4         | 460          | 0.1           | 4         | 170          | 0.1           | 4         | 180          | 0.1           | 4         |
| XGB9  | 480          | 0.1           | 2         | 190          | 0.1           | 4         | 110          | 0.05          | 6         | 120          | 0.05          | 6         |
| XGB10 | 60           | 0.1           | 4         | 250          | 0.05          | 4         | 240          | 0.05          | 4         | 180          | 0.05          | 4         |
| XGB11 | 150          | 0.05          | 4         | 300          | 0.05          | 4         | 100          | 0.05          | 6         | 130          | 0.05          | 6         |
| XGB12 | 140          | 0.1           | 4         | 60           | 0.1           | 8         | 110          | 0.1           | 4         | 430          | 0.05          | 4         |
| XGB13 | 190          | 0.05          | 4         | 470          | 0.05          | 2         | 260          | 0.05          | 4         | 60           | 0.1           | 6         |
| XGB14 | 210          | 0.05          | 4         | 140          | 0.1           | 6         | 460          | 0.05          | 4         | 160          | 0.05          | 4         |
| XGB15 | 350          | 0.05          | 4         | 280          | 0.1           | 4         | 110          | 0.05          | 6         | 460          | 0.05          | 4         |
| XGB16 | 480          | 0.05          | 4         | 430          | 0.1           | 4         | 490          | 0.05          | 4         | 490          | 0.1           | 4         |
| XGB17 | 490          | 0.15          | 4         | 490          | 0.15          | 4         | 490          | 0.3           | 2         | 490          | 0.1           | 4         |
| XGB18 | 490          | 0.1           | 4         | 490          | 0.15          | 4         | 490          | 0.1           | 4         | 490          | 0.3           | 2         |



**Table S15.** Best hyper parameters in LGB models at humid stations

|       | <b>Jorhat</b> |               |           | <b>Mohanpur</b> |               |           | <b>Palampur</b> |               |           | <b>Thrissur</b> |               |           |
|-------|---------------|---------------|-----------|-----------------|---------------|-----------|-----------------|---------------|-----------|-----------------|---------------|-----------|
|       | n_estimators  | learning_rate | max_depth | n_estimators    | learning_rate | max_depth | n_estimators    | learning_rate | max_depth | n_estimators    | learning_rate | max_depth |
| LGB1  | 140           | 0.05          | 2         | 90              | 0.05          | 4         | 80              | 0.05          | 4         | 180             | 0.1           | 2         |
| LGB2  | 130           | 0.05          | 4         | 90              | 0.05          | 6         | 110             | 0.05          | 4         | 110             | 0.05          | 4         |
| LGB3  | 50            | 0.1           | 4         | 290             | 0.1           | 2         | 80              | 0.05          | 14        | 210             | 0.05          | 4         |
| LGB4  | 80            | 0.1           | 4         | 260             | 0.05          | 4         | 120             | 0.05          | 6         | 100             | 0.05          | 4         |
| LGB5  | 100           | 0.1           | 4         | 140             | 0.05          | 6         | 100             | 0.05          | 8         | 90              | 0.05          | 4         |
| LGB6  | 90            | 0.05          | 4         | 130             | 0.05          | 4         | 120             | 0.1           | 4         | 30              | 0.15          | 18        |
| LGB7  | 200           | 0.05          | 4         | 170             | 0.05          | 14        | 160             | 0.05          | 10        | 460             | 0.1           | 2         |
| LGB8  | 220           | 0.05          | 16        | 300             | 0.05          | 12        | 110             | 0.05          | 10        | 490             | 0.05          | 4         |
| LGB9  | 480           | 0.1           | 2         | 360             | 0.05          | 4         | 130             | 0.05          | 6         | 90              | 0.05          | 6         |
| LGB10 | 60            | 0.1           | 4         | 80              | 0.1           | 6         | 100             | 0.05          | 6         | 90              | 0.05          | 18        |
| LGB11 | 140           | 0.05          | 4         | 180             | 0.05          | 4         | 50              | 0.1           | 14        | 110             | 0.05          | 8         |
| LGB12 | 380           | 0.1           | 2         | 160             | 0.05          | 10        | 370             | 0.05          | 4         | 290             | 0.05          | 4         |
| LGB13 | 150           | 0.05          | 4         | 370             | 0.1           | 2         | 300             | 0.05          | 4         | 110             | 0.05          | 10        |
| LGB14 | 130           | 0.1           | 4         | 220             | 0.1           | 4         | 170             | 0.05          | 8         | 150             | 0.05          | 4         |
| LGB15 | 440           | 0.05          | 4         | 490             | 0.05          | 4         | 110             | 0.05          | 10        | 140             | 0.05          | 8         |
| LGB16 | 240           | 0.05          | 14        | 390             | 0.05          | 8         | 490             | 0.05          | 4         | 490             | 0.3           | 2         |
| LGB17 | 490           | 0.1           | 4         | 490             | 0.1           | 8         | 490             | 0.1           | 4         | 490             | 0.1           | 4         |
| LGB18 | 490           | 0.1           | 4         | 490             | 0.05          | 14        | 490             | 0.1           | 4         | 490             | 0.3           | 2         |

**Table S16.** Best hyper parameters in RF models at sub-humid stations

|      | Faizabad     |                  |           | Jabalpur     |                  |           | Raipur       |                  |           | Ranchi       |                  |           | Ranichauri   |                  |           | Samastipur   |                  |           |
|------|--------------|------------------|-----------|--------------|------------------|-----------|--------------|------------------|-----------|--------------|------------------|-----------|--------------|------------------|-----------|--------------|------------------|-----------|
|      | n_estimators | min_samples_leaf | max_depth |
| RF1  | 480          | 1                | 6         | 460          | 5                | 6         | 30           | 5                | 6         | 70           | 5                | 6         | 310          | 1                | 6         | 30           | 3                | 6         |
| RF2  | 70           | 5                | 8         | 390          | 5                | 8         | 150          | 5                | 8         | 80           | 5                | 6         | 420          | 5                | 8         | 330          | 1                | 8         |
| RF3  | 460          | 1                | 8         | 280          | 5                | 8         | 330          | 3                | 8         | 320          | 5                | 8         | 170          | 5                | 8         | 480          | 5                | 8         |
| RF4  | 490          | 5                | 10        | 140          | 5                | 10        | 210          | 1                | 8         | 410          | 5                | 8         | 320          | 5                | 10        | 240          | 3                | 8         |
| RF5  | 110          | 1                | 8         | 200          | 3                | 8         | 240          | 1                | 8         | 160          | 5                | 8         | 460          | 5                | 8         | 400          | 1                | 8         |
| RF6  | 330          | 3                | 8         | 260          | 5                | 8         | 250          | 5                | 8         | 430          | 5                | 8         | 280          | 5                | 8         | 80           | 1                | 8         |
| RF7  | 230          | 3                | 12        | 190          | 5                | 18        | 290          | 1                | 10        | 190          | 5                | 18        | 290          | 1                | 14        | 450          | 1                | 10        |
| RF8  | 370          | 3                | 14        | 440          | 1                | 14        | 120          | 1                | 14        | 390          | 1                | 14        | 240          | 1                | 10        | 410          | 1                | 12        |
| RF9  | 310          | 3                | 12        | 180          | 5                | 12        | 300          | 5                | 12        | 290          | 5                | 16        | 330          | 3                | 12        | 410          | 1                | 12        |
| RF10 | 280          | 1                | 10        | 350          | 5                | 10        | 150          | 5                | 8         | 290          | 5                | 8         | 210          | 5                | 10        | 340          | 1                | 10        |
| RF11 | 400          | 5                | 16        | 270          | 5                | 18        | 300          | 3                | 10        | 180          | 3                | 10        | 230          | 3                | 10        | 230          | 1                | 10        |
| RF12 | 380          | 5                | 18        | 170          | 5                | 12        | 420          | 1                | 10        | 150          | 5                | 12        | 260          | 5                | 16        | 150          | 1                | 10        |
| RF13 | 310          | 1                | 10        | 210          | 5                | 12        | 350          | 3                | 12        | 240          | 3                | 8         | 480          | 5                | 10        | 330          | 3                | 10        |
| RF14 | 290          | 5                | 14        | 300          | 5                | 14        | 210          | 1                | 10        | 480          | 5                | 10        | 270          | 3                | 12        | 200          | 3                | 12        |
| RF15 | 190          | 1                | 12        | 330          | 1                | 12        | 440          | 1                | 12        | 310          | 1                | 12        | 340          | 3                | 10        | 300          | 3                | 14        |
| RF16 | 300          | 1                | 18        | 440          | 1                | 16        | 480          | 1                | 18        | 470          | 1                | 18        | 280          | 1                | 18        | 480          | 1                | None      |
| RF17 | 320          | 1                | None      | 320          | 1                | None      | 450          | 1                | 18        | 280          | 1                | 18        | 480          | 1                | None      | 400          | 1                | None      |
| RF18 | 470          | 1                | 18        | 440          | 1                | 18        | 440          | 1                | 16        | 240          | 1                | 16        | 430          | 1                | None      | 260          | 1                | None      |

**Table S17.** Best hyper parameters in XGB models at sub-humid stations

|           | Faizabad         |                   |               | Jabalpur         |                   |               | Raipur           |                   |               | Ranchi           |                   |               | Ranichauri       |                   |               | Samastipur       |                   |               |
|-----------|------------------|-------------------|---------------|------------------|-------------------|---------------|------------------|-------------------|---------------|------------------|-------------------|---------------|------------------|-------------------|---------------|------------------|-------------------|---------------|
|           | n_estim<br>ators | learning<br>_rate | max_d<br>epth |
| XG<br>B1  | 140              | 0.05              | 4             | 100              | 0.05              | 4             | 120              | 0.05              | 2             | 140              | 0.1               | 2             | 50               | 0.1               | 4             | 50               | 0.1               | 4             |
| XG<br>B2  | 140              | 0.05              | 4             | 50               | 0.1               | 4             | 50               | 0.1               | 4             | 430              | 0.05              | 2             | 40               | 0.15              | 4             | 60               | 0.1               | 6             |
| XG<br>B3  | 130              | 0.1               | 4             | 170              | 0.1               | 4             | 80               | 0.1               | 4             | 420              | 0.05              | 2             | 140              | 0.05              | 4             | 140              | 0.05              | 4             |
| XG<br>B4  | 60               | 0.1               | 6             | 210              | 0.05              | 4             | 450              | 0.05              | 2             | 160              | 0.05              | 4             | 250              | 0.05              | 4             | 330              | 0.05              | 4             |
| XG<br>B5  | 220              | 0.05              | 4             | 210              | 0.05              | 4             | 120              | 0.05              | 4             | 120              | 0.05              | 4             | 120              | 0.05              | 6             | 160              | 0.1               | 4             |
| XG<br>B6  | 210              | 0.05              | 4             | 100              | 0.1               | 4             | 110              | 0.05              | 4             | 50               | 0.1               | 4             | 200              | 0.05              | 4             | 90               | 0.15              | 4             |
| XG<br>B7  | 140              | 0.05              | 6             | 310              | 0.05              | 4             | 120              | 0.05              | 6             | 220              | 0.05              | 4             | 480              | 0.05              | 4             | 170              | 0.05              | 6             |
| XG<br>B8  | 270              | 0.1               | 4             | 490              | 0.05              | 4             | 320              | 0.05              | 6             | 340              | 0.05              | 6             | 160              | 0.05              | 6             | 490              | 0.05              | 4             |
| XG<br>B9  | 200              | 0.1               | 4             | 150              | 0.1               | 4             | 100              | 0.05              | 6             | 250              | 0.05              | 4             | 210              | 0.05              | 6             | 340              | 0.05              | 4             |
| XG<br>B10 | 130              | 0.05              | 6             | 120              | 0.05              | 6             | 110              | 0.05              | 4             | 170              | 0.05              | 4             | 100              | 0.05              | 6             | 220              | 0.05              | 4             |
| XG<br>B11 | 320              | 0.05              | 4             | 150              | 0.1               | 4             | 260              | 0.05              | 4             | 60               | 0.15              | 4             | 120              | 0.05              | 6             | 130              | 0.05              | 6             |
| XG<br>B12 | 70               | 0.15              | 6             | 160              | 0.1               | 4             | 50               | 0.1               | 6             | 220              | 0.05              | 4             | 130              | 0.05              | 6             | 140              | 0.05              | 6             |
| XG<br>B13 | 490              | 0.05              | 4             | 130              | 0.05              | 6             | 330              | 0.05              | 4             | 80               | 0.1               | 4             | 190              | 0.05              | 4             | 280              | 0.05              | 4             |
| XG<br>B14 | 140              | 0.05              | 6             | 370              | 0.05              | 4             | 100              | 0.05              | 6             | 50               | 0.15              | 6             | 350              | 0.05              | 4             | 120              | 0.05              | 6             |
| XG<br>B15 | 350              | 0.1               | 4             | 470              | 0.05              | 4             | 370              | 0.1               | 4             | 460              | 0.05              | 4             | 130              | 0.05              | 6             | 470              | 0.05              | 4             |
| XG<br>B16 | 490              | 0.15              | 4             | 490              | 0.1               | 4             | 490              | 0.1               | 4             | 490              | 0.3               | 2             | 480              | 0.05              | 4             | 400              | 0.05              | 6             |
| XG<br>B17 | 490              | 0.1               | 4             | 490              | 0.1               | 4             | 490              | 0.15              | 4             | 490              | 0.15              | 4             | 490              | 0.3               | 2             | 490              | 0.1               | 4             |
| XG<br>B18 | 490              | 0.1               | 4             | 490              | 0.1               | 4             | 490              | 0.15              | 4             | 490              | 0.15              | 4             | 490              | 0.1               | 4             | 490              | 0.1               | 4             |

**Table S18.** Best hyper parameters in LGB models at sub-humid stations

|        | Faizabad     |               |           | Jabalpur     |               |           | Raipur       |               |           | Ranchi       |               |           | Ranichauri   |               |           | Samastipur   |               |           |
|--------|--------------|---------------|-----------|--------------|---------------|-----------|--------------|---------------|-----------|--------------|---------------|-----------|--------------|---------------|-----------|--------------|---------------|-----------|
|        | n_estimators | learning_rate | max_depth |
| LGB 1  | 200          | 0.05          | 4         | 100          | 0.05          | 4         | 40           | 0.1           | 4         | 50           | 0.1           | 4         | 80           | 0.05          | 4         | 60           | 0.1           | 4         |
| LGB 2  | 80           | 0.05          | 14        | 110          | 0.05          | 4         | 120          | 0.05          | 4         | 130          | 0.05          | 4         | 110          | 0.05          | 4         | 160          | 0.05          | 6         |
| LGB 3  | 160          | 0.05          | 4         | 50           | 0.1           | 6         | 280          | 0.05          | 4         | 300          | 0.1           | 2         | 110          | 0.05          | 6         | 180          | 0.05          | 4         |
| LGB 4  | 130          | 0.05          | 16        | 100          | 0.05          | 6         | 80           | 0.05          | 6         | 290          | 0.05          | 4         | 100          | 0.05          | 8         | 120          | 0.05          | 10        |
| LGB 5  | 290          | 0.05          | 4         | 170          | 0.05          | 4         | 460          | 0.05          | 2         | 210          | 0.05          | 4         | 120          | 0.05          | 6         | 110          | 0.05          | None      |
| LGB 6  | 270          | 0.05          | 4         | 90           | 0.05          | 6         | 30           | 0.15          | 4         | 130          | 0.05          | 4         | 110          | 0.05          | None      | 100          | 0.05          | 16        |
| LGB 7  | 100          | 0.05          | 8         | 140          | 0.05          | 6         | 30           | 0.15          | 6         | 150          | 0.05          | 6         | 490          | 0.05          | 4         | 220          | 0.05          | 16        |
| LGB 8  | 160          | 0.05          | 8         | 490          | 0.05          | 4         | 490          | 0.1           | 4         | 190          | 0.05          | 16        | 150          | 0.05          | None      | 410          | 0.05          | 4         |
| LGB 9  | 360          | 0.1           | 4         | 260          | 0.05          | 4         | 100          | 0.05          | 6         | 140          | 0.05          | 6         | 180          | 0.05          | 16        | 200          | 0.05          | 8         |
| LGB 10 | 100          | 0.05          | 12        | 90           | 0.05          | 6         | 110          | 0.05          | 4         | 180          | 0.05          | 4         | 120          | 0.05          | 6         | 110          | 0.05          | 8         |
| LGB 11 | 290          | 0.05          | 6         | 170          | 0.05          | 6         | 140          | 0.05          | 10        | 260          | 0.05          | 4         | 130          | 0.05          | 6         | 120          | 0.05          | 12        |
| LGB 12 | 80           | 0.1           | 6         | 120          | 0.05          | 6         | 300          | 0.15          | 2         | 120          | 0.05          | 6         | 210          | 0.05          | 6         | 200          | 0.05          | 10        |
| LGB 13 | 170          | 0.05          | 12        | 390          | 0.05          | 4         | 130          | 0.05          | 8         | 280          | 0.05          | 4         | 190          | 0.05          | 4         | 110          | 0.05          | 8         |
| LGB 14 | 130          | 0.05          | 12        | 60           | 0.1           | 6         | 100          | 0.05          | 14        | 370          | 0.05          | 4         | 180          | 0.1           | 4         | 180          | 0.05          | 12        |
| LGB 15 | 490          | 0.05          | 6         | 280          | 0.05          | 8         | 490          | 0.15          | 4         | 210          | 0.05          | 10        | 170          | 0.05          | 8         | 250          | 0.05          | 8         |
| LGB 16 | 490          | 0.1           | 4         | 490          | 0.1           | 4         | 490          | 0.15          | 4         | 450          | 0.15          | 4         | 250          | 0.05          | 10        | 410          | 0.05          | 14        |
| LGB 17 | 490          | 0.1           | 12        | 490          | 0.15          | 4         | 490          | 0.15          | 4         | 490          | 0.1           | None      | 490          | 0.3           | 2         | 490          | 0.1           | 4         |
| LGB 18 | 490          | 0.1           | 16        | 490          | 0.1           | 4         | 490          | 0.15          | 4         | 490          | 0.3           | 4         | 490          | 0.15          | 4         | 490          | 0.1           | 4         |

**Table S19.** Performance indicators of hybrid ML models at Jorhat

| RANK | MODEL   | GPI    | d     | MBE   | RMSE  | R <sup>2</sup> | MODEL    | GPI    | d     | MBE   | RMSE  | R <sup>2</sup> | MODEL    | GPI    | d     | MBE   | RMSE  | R <sup>2</sup> |
|------|---------|--------|-------|-------|-------|----------------|----------|--------|-------|-------|-------|----------------|----------|--------|-------|-------|-------|----------------|
| 1    | GWORF17 | 1.527  | 0.987 | 0.105 | 0.240 | 0.952          | GWOXGB17 | 1.648  | 0.995 | 0.069 | 0.144 | 0.983          | GWOLGB18 | 1.639  | 0.994 | 0.072 | 0.168 | 0.977          |
| 2    | GWORF18 | 1.481  | 0.985 | 0.108 | 0.252 | 0.947          | GWOXGB18 | 1.640  | 0.995 | 0.067 | 0.148 | 0.982          | GWOLGB17 | 1.619  | 0.993 | 0.075 | 0.174 | 0.975          |
| 3    | GWORF8  | 1.414  | 0.985 | 0.139 | 0.253 | 0.946          | GWOXGB8  | 1.370  | 0.990 | 0.127 | 0.207 | 0.963          | GWOLGB8  | 1.350  | 0.988 | 0.131 | 0.231 | 0.955          |
| 4    | GWORF9  | 1.371  | 0.984 | 0.142 | 0.263 | 0.941          | GWOXGB9  | 1.036  | 0.980 | 0.157 | 0.298 | 0.923          | GWOLGB12 | 1.098  | 0.980 | 0.156 | 0.294 | 0.925          |
| 5    | GWORF12 | 1.204  | 0.979 | 0.158 | 0.300 | 0.922          | GWOXGB12 | 1.023  | 0.979 | 0.158 | 0.301 | 0.921          | GWOLGB9  | 1.089  | 0.980 | 0.157 | 0.297 | 0.924          |
| 6    | GWORF7  | 1.027  | 0.975 | 0.192 | 0.329 | 0.906          | GWOXGB7  | 0.867  | 0.975 | 0.193 | 0.327 | 0.907          | GWOLGB7  | 0.915  | 0.975 | 0.193 | 0.326 | 0.908          |
| 7    | GWORF5  | 0.994  | 0.974 | 0.199 | 0.333 | 0.903          | GWOXGB5  | 0.842  | 0.975 | 0.198 | 0.331 | 0.905          | GWOLGB5  | 0.891  | 0.975 | 0.199 | 0.330 | 0.906          |
| 8    | GWORF16 | 0.812  | 0.970 | 0.246 | 0.354 | 0.893          | GWOXGB16 | 0.829  | 0.976 | 0.230 | 0.318 | 0.913          | GWOLGB16 | 0.827  | 0.974 | 0.232 | 0.330 | 0.906          |
| 9    | GWORF15 | 0.666  | 0.965 | 0.270 | 0.377 | 0.878          | GWOXGB15 | 0.627  | 0.970 | 0.262 | 0.357 | 0.890          | GWOLGB15 | 0.642  | 0.968 | 0.264 | 0.362 | 0.887          |
| 10   | GWORF14 | 0.224  | 0.950 | 0.320 | 0.452 | 0.822          | GWOXGB14 | 0.175  | 0.952 | 0.317 | 0.443 | 0.830          | GWOLGB14 | 0.182  | 0.951 | 0.320 | 0.448 | 0.826          |
| 11   | GWORF4  | 0.078  | 0.944 | 0.342 | 0.472 | 0.806          | GWOXGB4  | 0.005  | 0.945 | 0.340 | 0.471 | 0.808          | GWOLGB4  | 0.040  | 0.945 | 0.341 | 0.469 | 0.809          |
| 12   | GWORF13 | -0.716 | 0.906 | 0.431 | 0.581 | 0.708          | GWOXGB13 | -0.591 | 0.915 | 0.418 | 0.559 | 0.730          | GWOLGB13 | -0.632 | 0.910 | 0.423 | 0.568 | 0.722          |
| 13   | GWORF10 | -0.721 | 0.907 | 0.423 | 0.587 | 0.701          | GWOXGB10 | -0.726 | 0.908 | 0.422 | 0.585 | 0.703          | GWOLGB10 | -0.718 | 0.908 | 0.423 | 0.587 | 0.702          |
| 14   | GWORF2  | -1.196 | 0.884 | 0.481 | 0.644 | 0.641          | GWOXGB2  | -1.129 | 0.887 | 0.478 | 0.635 | 0.650          | GWOLGB2  | -1.148 | 0.884 | 0.478 | 0.640 | 0.645          |
| 15   | GWORF11 | -1.773 | 0.845 | 0.534 | 0.705 | 0.570          | GWOXGB11 | -1.573 | 0.856 | 0.525 | 0.687 | 0.591          | GWOLGB11 | -1.679 | 0.847 | 0.531 | 0.701 | 0.576          |
| 16   | GWORF6  | -1.835 | 0.843 | 0.540 | 0.712 | 0.559          | GWOXGB6  | -1.751 | 0.844 | 0.536 | 0.710 | 0.562          | GWOLGB6  | -1.742 | 0.844 | 0.536 | 0.708 | 0.564          |
| 17   | GWORF3  | -2.081 | 0.822 | 0.558 | 0.735 | 0.533          | GWOXGB3  | -1.941 | 0.827 | 0.553 | 0.728 | 0.541          | GWOLGB3  | -2.013 | 0.821 | 0.558 | 0.736 | 0.531          |
| 18   | GWORF1  | -2.473 | 0.801 | 0.599 | 0.776 | 0.478          | GWOXGB1  | -2.349 | 0.800 | 0.598 | 0.772 | 0.483          | GWOLGB1  | -2.361 | 0.800 | 0.598 | 0.772 | 0.482          |

**Table S20.** Performance indicators of hybrid ML models at Mohanpur

| RANK | MODEL   | GPI    | d     | MBE   | RMSE  | R <sup>2</sup> | MODEL    | GPI    | d     | MBE   | RMSE  | R <sup>2</sup> | MODEL    | GPI    | d     | MBE   | RMSE  | R <sup>2</sup> |
|------|---------|--------|-------|-------|-------|----------------|----------|--------|-------|-------|-------|----------------|----------|--------|-------|-------|-------|----------------|
| 1    | GWORF17 | 1.687  | 0.998 | 0.074 | 0.116 | 0.991          | GWOXGB17 | 1.738  | 0.999 | 0.051 | 0.076 | 0.996          | GWOLGB17 | 1.734  | 0.999 | 0.052 | 0.083 | 0.995          |
| 2    | GWORF18 | 1.666  | 0.997 | 0.075 | 0.122 | 0.990          | GWOXGB18 | 1.720  | 0.999 | 0.053 | 0.081 | 0.996          | GWOLGB18 | 1.692  | 0.998 | 0.055 | 0.096 | 0.994          |
| 3    | GWORF8  | 1.553  | 0.997 | 0.097 | 0.141 | 0.987          | GWOXGB8  | 1.509  | 0.997 | 0.090 | 0.127 | 0.989          | GWOLGB8  | 1.512  | 0.997 | 0.091 | 0.130 | 0.989          |
| 4    | GWORF9  | 1.543  | 0.996 | 0.098 | 0.143 | 0.986          | GWOXGB9  | 1.189  | 0.993 | 0.125 | 0.199 | 0.973          | GWOLGB9  | 1.209  | 0.993 | 0.125 | 0.197 | 0.974          |
| 5    | GWORF12 | 1.245  | 0.993 | 0.128 | 0.206 | 0.971          | GWOXGB12 | 1.140  | 0.992 | 0.129 | 0.210 | 0.970          | GWOLGB12 | 1.183  | 0.993 | 0.127 | 0.203 | 0.972          |
| 6    | GWORF7  | 1.211  | 0.992 | 0.137 | 0.208 | 0.971          | GWOXGB7  | 1.131  | 0.993 | 0.136 | 0.207 | 0.971          | GWOLGB7  | 1.153  | 0.993 | 0.136 | 0.205 | 0.971          |
| 7    | GWORF5  | 1.119  | 0.991 | 0.149 | 0.224 | 0.966          | GWOXGB5  | 1.031  | 0.991 | 0.150 | 0.225 | 0.965          | GWOLGB5  | 1.056  | 0.991 | 0.149 | 0.222 | 0.966          |
| 8    | GWORF16 | 0.885  | 0.988 | 0.185 | 0.258 | 0.955          | GWOXGB16 | 0.881  | 0.989 | 0.180 | 0.245 | 0.959          | GWOLGB16 | 0.868  | 0.989 | 0.180 | 0.250 | 0.957          |
| 9    | GWORF15 | 0.841  | 0.988 | 0.192 | 0.264 | 0.953          | GWOXGB15 | 0.853  | 0.989 | 0.185 | 0.250 | 0.958          | GWOLGB15 | 0.866  | 0.989 | 0.184 | 0.249 | 0.958          |
| 10   | GWORF14 | 0.362  | 0.980 | 0.243 | 0.337 | 0.923          | GWOXGB14 | 0.318  | 0.980 | 0.244 | 0.336 | 0.923          | GWOLGB14 | 0.345  | 0.980 | 0.243 | 0.333 | 0.925          |
| 11   | GWORF4  | 0.240  | 0.977 | 0.257 | 0.353 | 0.915          | GWOXGB4  | 0.241  | 0.978 | 0.254 | 0.347 | 0.918          | GWOLGB4  | 0.258  | 0.979 | 0.253 | 0.345 | 0.919          |
| 12   | GWORF11 | -1.397 | 0.941 | 0.396 | 0.549 | 0.795          | GWOXGB10 | -1.324 | 0.943 | 0.402 | 0.543 | 0.800          | GWOLGB11 | -1.351 | 0.942 | 0.396 | 0.546 | 0.797          |
| 13   | GWORF10 | -1.424 | 0.941 | 0.406 | 0.551 | 0.794          | GWOXGB11 | -1.349 | 0.942 | 0.395 | 0.548 | 0.796          | GWOLGB10 | -1.374 | 0.942 | 0.403 | 0.549 | 0.796          |
| 14   | GWORF13 | -1.569 | 0.937 | 0.420 | 0.564 | 0.784          | GWOXGB13 | -1.444 | 0.940 | 0.413 | 0.554 | 0.792          | GWOLGB13 | -1.463 | 0.940 | 0.414 | 0.555 | 0.791          |
| 15   | GWORF6  | -1.680 | 0.934 | 0.426 | 0.576 | 0.775          | GWOXGB6  | -1.618 | 0.935 | 0.426 | 0.573 | 0.777          | GWOLGB6  | -1.630 | 0.935 | 0.427 | 0.573 | 0.777          |
| 16   | GWORF3  | -1.859 | 0.930 | 0.442 | 0.592 | 0.762          | GWOXGB3  | -1.735 | 0.932 | 0.436 | 0.584 | 0.769          | GWOLGB3  | -1.726 | 0.932 | 0.435 | 0.582 | 0.770          |
| 17   | GWORF2  | -2.111 | 0.924 | 0.468 | 0.615 | 0.743          | GWOXGB2  | -2.016 | 0.925 | 0.465 | 0.611 | 0.747          | GWOLGB2  | -2.066 | 0.923 | 0.467 | 0.614 | 0.744          |
| 18   | GWORF1  | -2.313 | 0.918 | 0.483 | 0.633 | 0.728          | GWOXGB1  | -2.262 | 0.918 | 0.484 | 0.633 | 0.728          | GWOLGB1  | -2.266 | 0.917 | 0.483 | 0.632 | 0.729          |

**Table S21.** Performance indicators of hybrid ML models at Palampur

| RANK | MODEL   | GPI    | d     | MBE   | RMSE  | R <sup>2</sup> | MODEL    | GPI    | d     | MBE   | RMSE  | R <sup>2</sup> | MODEL    | GPI    | d     | MBE   | RMSE  | R <sup>2</sup> |
|------|---------|--------|-------|-------|-------|----------------|----------|--------|-------|-------|-------|----------------|----------|--------|-------|-------|-------|----------------|
| 1    | GWORF18 | 1.743  | 0.997 | 0.098 | 0.145 | 0.990          | GWOXGB18 | 1.809  | 0.999 | 0.072 | 0.099 | 0.995          | GWOLGB18 | 1.801  | 0.999 | 0.072 | 0.099 | 0.995          |
| 2    | GWORF17 | 1.678  | 0.997 | 0.111 | 0.157 | 0.988          | GWOXGB17 | 1.793  | 0.999 | 0.076 | 0.102 | 0.995          | GWOLGB17 | 1.782  | 0.999 | 0.076 | 0.104 | 0.995          |
| 3    | GWORF7  | 1.010  | 0.990 | 0.194 | 0.286 | 0.961          | GWOXGB7  | 0.957  | 0.990 | 0.192 | 0.283 | 0.962          | GWOLGB7  | 0.943  | 0.990 | 0.193 | 0.283 | 0.961          |
| 4    | GWORF16 | 0.830  | 0.988 | 0.231 | 0.308 | 0.954          | GWOXGB16 | 0.852  | 0.989 | 0.221 | 0.293 | 0.959          | GWOLGB16 | 0.845  | 0.989 | 0.221 | 0.292 | 0.959          |
| 5    | GWORF8  | 0.617  | 0.985 | 0.249 | 0.345 | 0.943          | GWOXGB8  | 0.539  | 0.985 | 0.252 | 0.350 | 0.941          | GWOLGB8  | 0.567  | 0.985 | 0.248 | 0.343 | 0.943          |
| 6    | GWORF9  | 0.608  | 0.985 | 0.250 | 0.347 | 0.942          | GWOXGB12 | 0.349  | 0.982 | 0.274 | 0.380 | 0.930          | GWOLGB12 | 0.358  | 0.982 | 0.272 | 0.377 | 0.932          |
| 7    | GWORF12 | 0.359  | 0.981 | 0.276 | 0.385 | 0.929          | GWOXGB9  | 0.321  | 0.981 | 0.276 | 0.385 | 0.929          | GWOLGB9  | 0.336  | 0.982 | 0.274 | 0.380 | 0.930          |
| 8    | GWORF14 | 0.255  | 0.980 | 0.291 | 0.399 | 0.924          | GWOXGB14 | 0.275  | 0.981 | 0.287 | 0.390 | 0.927          | GWOLGB14 | 0.270  | 0.981 | 0.286 | 0.389 | 0.927          |
| 9    | GWORF10 | 0.198  | 0.979 | 0.292 | 0.409 | 0.920          | GWOXGB10 | 0.200  | 0.979 | 0.289 | 0.404 | 0.921          | GWOLGB10 | 0.180  | 0.979 | 0.290 | 0.405 | 0.921          |
| 10   | GWORF5  | 0.059  | 0.977 | 0.308 | 0.427 | 0.912          | GWOXGB5  | 0.031  | 0.977 | 0.311 | 0.427 | 0.912          | GWOLGB5  | 0.039  | 0.977 | 0.308 | 0.424 | 0.913          |
| 11   | GWORF15 | -0.029 | 0.976 | 0.326 | 0.436 | 0.909          | GWOXGB15 | -0.049 | 0.975 | 0.325 | 0.436 | 0.908          | GWOLGB15 | -0.045 | 0.976 | 0.325 | 0.433 | 0.909          |
| 12   | GWORF13 | -0.174 | 0.973 | 0.345 | 0.454 | 0.901          | GWOXGB13 | -0.145 | 0.974 | 0.341 | 0.448 | 0.903          | GWOLGB13 | -0.161 | 0.974 | 0.342 | 0.449 | 0.903          |
| 13   | GWORF2  | -0.740 | 0.964 | 0.400 | 0.525 | 0.867          | GWOXGB2  | -0.675 | 0.964 | 0.396 | 0.519 | 0.870          | GWOLGB2  | -0.686 | 0.964 | 0.396 | 0.518 | 0.871          |
| 14   | GWORF11 | -0.763 | 0.963 | 0.393 | 0.531 | 0.864          | GWOXGB11 | -0.788 | 0.961 | 0.396 | 0.537 | 0.862          | GWOLGB11 | -0.758 | 0.962 | 0.392 | 0.531 | 0.864          |
| 15   | GWORF4  | -0.816 | 0.962 | 0.403 | 0.536 | 0.862          | GWOXGB4  | -0.793 | 0.962 | 0.405 | 0.535 | 0.862          | GWOLGB4  | -0.796 | 0.962 | 0.402 | 0.534 | 0.863          |
| 16   | GWORF6  | -1.190 | 0.954 | 0.427 | 0.582 | 0.837          | GWOXGB6  | -1.135 | 0.954 | 0.424 | 0.581 | 0.838          | GWOLGB6  | -1.116 | 0.955 | 0.422 | 0.576 | 0.840          |
| 17   | GWORF3  | -1.387 | 0.951 | 0.455 | 0.601 | 0.826          | GWOXGB3  | -1.351 | 0.950 | 0.457 | 0.601 | 0.826          | GWOLGB3  | -1.360 | 0.950 | 0.456 | 0.599 | 0.827          |
| 18   | GWORF1  | -2.257 | 0.933 | 0.530 | 0.689 | 0.771          | GWOXGB1  | -2.191 | 0.932 | 0.530 | 0.691 | 0.770          | GWOLGB1  | -2.199 | 0.932 | 0.532 | 0.688 | 0.772          |

**Table S22.** Performance indicators of hybrid ML models at Thrissur

| RANK | MODEL   | GPI    | d     | MBE   | RMSE  | R <sup>2</sup> | MODEL    | GPI    | d     | MBE   | RMSE  | R <sup>2</sup> | MODEL    | GPI    | d     | MBE   | RMSE  | R <sup>2</sup> |
|------|---------|--------|-------|-------|-------|----------------|----------|--------|-------|-------|-------|----------------|----------|--------|-------|-------|-------|----------------|
| 1    | GWORF17 | 1.404  | 0.997 | 0.076 | 0.127 | 0.990          | GWOXGB18 | 1.513  | 0.999 | 0.053 | 0.073 | 0.997          | GWOLGB18 | 1.514  | 0.999 | 0.054 | 0.074 | 0.996          |
| 2    | GWORF18 | 1.369  | 0.997 | 0.082 | 0.138 | 0.988          | GWOXGB17 | 1.488  | 0.999 | 0.056 | 0.084 | 0.996          | GWOLGB17 | 1.490  | 0.999 | 0.056 | 0.085 | 0.995          |
| 3    | GWORF16 | 1.163  | 0.994 | 0.129 | 0.189 | 0.977          | GWOXGB16 | 1.205  | 0.995 | 0.119 | 0.167 | 0.982          | GWOLGB16 | 1.217  | 0.996 | 0.119 | 0.164 | 0.983          |
| 4    | GWORF8  | 1.162  | 0.994 | 0.116 | 0.199 | 0.975          | GWOXGB8  | 1.179  | 0.994 | 0.112 | 0.184 | 0.978          | GWOLGB8  | 1.193  | 0.995 | 0.110 | 0.182 | 0.979          |
| 5    | GWORF9  | 1.142  | 0.993 | 0.122 | 0.202 | 0.974          | GWOXGB15 | 1.038  | 0.993 | 0.150 | 0.214 | 0.971          | GWOLGB15 | 1.036  | 0.992 | 0.150 | 0.216 | 0.970          |
| 6    | GWORF15 | 1.027  | 0.992 | 0.154 | 0.223 | 0.968          | GWOXGB7  | 0.578  | 0.981 | 0.207 | 0.338 | 0.926          | GWOLGB7  | 0.581  | 0.981 | 0.207 | 0.338 | 0.927          |
| 7    | GWORF7  | 0.567  | 0.980 | 0.207 | 0.341 | 0.925          | GWOXGB14 | 0.473  | 0.978 | 0.231 | 0.357 | 0.918          | GWOLGB14 | 0.481  | 0.979 | 0.230 | 0.355 | 0.919          |
| 8    | GWORF14 | 0.456  | 0.978 | 0.231 | 0.360 | 0.917          | GWOXGB12 | 0.134  | 0.968 | 0.277 | 0.429 | 0.882          | GWOLGB12 | 0.150  | 0.969 | 0.275 | 0.424 | 0.884          |
| 9    | GWORF12 | 0.123  | 0.968 | 0.275 | 0.428 | 0.882          | GWOXGB9  | 0.104  | 0.967 | 0.281 | 0.434 | 0.879          | GWOLGB9  | 0.117  | 0.967 | 0.280 | 0.430 | 0.881          |
| 10   | GWORF4  | 0.030  | 0.966 | 0.293 | 0.442 | 0.874          | GWOXGB4  | 0.057  | 0.966 | 0.290 | 0.442 | 0.875          | GWOLGB4  | 0.059  | 0.966 | 0.292 | 0.440 | 0.876          |
| 11   | GWORF5  | -0.245 | 0.957 | 0.329 | 0.491 | 0.845          | GWOXGB5  | -0.210 | 0.956 | 0.326 | 0.491 | 0.845          | GWOLGB5  | -0.220 | 0.956 | 0.329 | 0.491 | 0.845          |
| 12   | GWORF13 | -0.306 | 0.957 | 0.365 | 0.490 | 0.846          | GWOXGB11 | -0.236 | 0.958 | 0.361 | 0.483 | 0.850          | GWOLGB11 | -0.220 | 0.959 | 0.358 | 0.479 | 0.852          |
| 13   | GWORF11 | -0.313 | 0.957 | 0.367 | 0.490 | 0.845          | GWOXGB13 | -0.270 | 0.957 | 0.364 | 0.490 | 0.846          | GWOLGB13 | -0.248 | 0.958 | 0.360 | 0.485 | 0.849          |
| 14   | GWORF3  | -0.460 | 0.952 | 0.389 | 0.514 | 0.830          | GWOXGB3  | -0.388 | 0.953 | 0.386 | 0.509 | 0.834          | GWOLGB3  | -0.398 | 0.953 | 0.387 | 0.509 | 0.833          |
| 15   | GWORF10 | -1.043 | 0.930 | 0.457 | 0.607 | 0.763          | GWOXGB10 | -0.945 | 0.932 | 0.453 | 0.601 | 0.768          | GWOLGB10 | -0.964 | 0.931 | 0.454 | 0.602 | 0.767          |
| 16   | GWORF2  | -1.205 | 0.924 | 0.478 | 0.631 | 0.745          | GWOXGB2  | -1.115 | 0.925 | 0.477 | 0.625 | 0.749          | GWOLGB2  | -1.130 | 0.925 | 0.477 | 0.626 | 0.748          |
| 17   | GWORF6  | -2.277 | 0.875 | 0.580 | 0.776 | 0.614          | GWOXGB6  | -2.117 | 0.878 | 0.574 | 0.769 | 0.622          | GWOLGB6  | -2.172 | 0.876 | 0.577 | 0.773 | 0.617          |
| 18   | GWORF1  | -2.596 | 0.857 | 0.607 | 0.812 | 0.577          | GWOXGB1  | -2.487 | 0.857 | 0.608 | 0.811 | 0.578          | GWOLGB1  | -2.486 | 0.858 | 0.605 | 0.809 | 0.580          |



**Table S23.** Performance indicators of hybrid ML models at Faizabad

| RANK | MODEL   | GPI    | d     | MBE   | RMSE  | R <sup>2</sup> | MODEL    | GPI    | d     | MBE   | RMSE  | R <sup>2</sup> | MODEL    | GPI    | d     | MBE   | RMSE  | R <sup>2</sup> |
|------|---------|--------|-------|-------|-------|----------------|----------|--------|-------|-------|-------|----------------|----------|--------|-------|-------|-------|----------------|
| 1    | GWORF17 | 1.956  | 0.997 | 0.150 | 0.234 | 0.990          | GWOXGB17 | 2.123  | 0.999 | 0.100 | 0.157 | 0.995          | GWOLGB17 | 2.121  | 0.999 | 0.098 | 0.165 | 0.995          |
| 2    | GWORF18 | 1.946  | 0.997 | 0.146 | 0.243 | 0.989          | GWOXGB18 | 2.120  | 0.999 | 0.101 | 0.157 | 0.995          | GWOLGB18 | 2.102  | 0.998 | 0.102 | 0.174 | 0.994          |
| 3    | GWORF8  | 1.522  | 0.992 | 0.244 | 0.383 | 0.971          | GWOXGB16 | 1.650  | 0.995 | 0.241 | 0.325 | 0.979          | GWOLGB16 | 1.667  | 0.995 | 0.236 | 0.323 | 0.980          |
| 4    | GWORF9  | 1.517  | 0.992 | 0.246 | 0.384 | 0.971          | GWOXGB8  | 1.564  | 0.993 | 0.239 | 0.370 | 0.973          | GWOLGB8  | 1.559  | 0.993 | 0.240 | 0.374 | 0.973          |
| 5    | GWORF16 | 1.484  | 0.993 | 0.273 | 0.382 | 0.972          | GWOXGB15 | 1.288  | 0.990 | 0.323 | 0.445 | 0.961          | GWOLGB15 | 1.280  | 0.990 | 0.323 | 0.450 | 0.960          |
| 6    | GWORF15 | 1.161  | 0.988 | 0.341 | 0.476 | 0.955          | GWOXGB13 | 1.099  | 0.987 | 0.376 | 0.495 | 0.952          | GWOLGB13 | 1.077  | 0.987 | 0.378 | 0.505 | 0.950          |
| 7    | GWORF13 | 1.007  | 0.986 | 0.384 | 0.512 | 0.948          | GWOXGB11 | 0.939  | 0.984 | 0.385 | 0.554 | 0.940          | GWOLGB11 | 0.928  | 0.984 | 0.386 | 0.559 | 0.939          |
| 8    | GWORF11 | 0.859  | 0.983 | 0.390 | 0.564 | 0.937          | GWOXGB3  | 0.691  | 0.980 | 0.450 | 0.613 | 0.926          | GWOLGB3  | 0.700  | 0.980 | 0.447 | 0.612 | 0.926          |
| 9    | GWORF3  | 0.606  | 0.980 | 0.455 | 0.619 | 0.925          | GWOXGB7  | -0.618 | 0.951 | 0.612 | 0.939 | 0.826          | GWOLGB7  | -0.591 | 0.952 | 0.613 | 0.930 | 0.829          |
| 10   | GWORF7  | -0.725 | 0.952 | 0.614 | 0.933 | 0.829          | GWOXGB9  | -0.834 | 0.947 | 0.665 | 0.976 | 0.812          | GWOLGB12 | -0.851 | 0.946 | 0.663 | 0.981 | 0.811          |
| 11   | GWORF12 | -1.037 | 0.945 | 0.670 | 0.990 | 0.807          | GWOXGB12 | -0.881 | 0.946 | 0.665 | 0.990 | 0.808          | GWOLGB5  | -0.870 | 0.946 | 0.673 | 0.981 | 0.811          |
| 12   | GWORF10 | -1.070 | 0.945 | 0.686 | 0.991 | 0.807          | GWOXGB5  | -0.889 | 0.946 | 0.677 | 0.985 | 0.809          | GWOLGB9  | -0.871 | 0.946 | 0.668 | 0.985 | 0.809          |
| 13   | GWORF5  | -1.077 | 0.944 | 0.682 | 0.993 | 0.806          | GWOXGB10 | -0.936 | 0.945 | 0.688 | 0.993 | 0.806          | GWOLGB10 | -0.911 | 0.945 | 0.686 | 0.986 | 0.808          |
| 14   | GWORF14 | -1.223 | 0.941 | 0.710 | 1.018 | 0.796          | GWOXGB14 | -1.103 | 0.940 | 0.711 | 1.025 | 0.793          | GWOLGB14 | -1.088 | 0.941 | 0.708 | 1.022 | 0.794          |
| 15   | GWORF4  | -1.599 | 0.933 | 0.774 | 1.080 | 0.770          | GWOXGB4  | -1.405 | 0.933 | 0.769 | 1.077 | 0.772          | GWOLGB4  | -1.408 | 0.933 | 0.770 | 1.076 | 0.772          |
| 16   | GWORF2  | -1.604 | 0.933 | 0.777 | 1.078 | 0.771          | GWOXGB6  | -1.461 | 0.932 | 0.776 | 1.088 | 0.767          | GWOLGB6  | -1.472 | 0.932 | 0.775 | 1.091 | 0.766          |
| 17   | GWORF6  | -1.683 | 0.931 | 0.780 | 1.098 | 0.763          | GWOXGB2  | -1.470 | 0.931 | 0.780 | 1.085 | 0.768          | GWOLGB2  | -1.491 | 0.930 | 0.781 | 1.086 | 0.767          |
| 18   | GWORF1  | -2.039 | 0.922 | 0.845 | 1.148 | 0.740          | GWOXGB1  | -1.877 | 0.921 | 0.847 | 1.154 | 0.738          | GWOLGB1  | -1.879 | 0.921 | 0.847 | 1.154 | 0.738          |

**Table S24.** Performance indicators of hybrid ML models at Jabalpur

| RANK | MODEL   | GPI    | d     | MBE   | RMSE  | R <sup>2</sup> | MODEL    | GPI    | d     | MBE   | RMSE  | R <sup>2</sup> | MODEL    | GPI    | d     | MBE   | RMSE  | R <sup>2</sup> |
|------|---------|--------|-------|-------|-------|----------------|----------|--------|-------|-------|-------|----------------|----------|--------|-------|-------|-------|----------------|
| 1    | GWORF17 | 1.920  | 0.998 | 0.104 | 0.163 | 0.991          | GWOXGB18 | 2.058  | 0.999 | 0.071 | 0.105 | 0.996          | GWOLGB18 | 2.055  | 0.999 | 0.071 | 0.104 | 0.997          |
| 2    | GWORF18 | 1.909  | 0.998 | 0.103 | 0.168 | 0.991          | GWOXGB17 | 2.052  | 0.999 | 0.073 | 0.105 | 0.996          | GWOLGB17 | 2.052  | 0.999 | 0.072 | 0.104 | 0.997          |
| 3    | GWORF16 | 1.434  | 0.995 | 0.178 | 0.249 | 0.980          | GWOXGB16 | 1.542  | 0.996 | 0.158 | 0.214 | 0.985          | GWOLGB16 | 1.545  | 0.996 | 0.157 | 0.211 | 0.985          |
| 4    | GWORF8  | 1.392  | 0.994 | 0.167 | 0.266 | 0.977          | GWOXGB8  | 1.370  | 0.995 | 0.165 | 0.257 | 0.978          | GWOLGB8  | 1.361  | 0.994 | 0.164 | 0.258 | 0.978          |
| 5    | GWORF9  | 1.336  | 0.994 | 0.173 | 0.276 | 0.975          | GWOXGB15 | 1.017  | 0.992 | 0.224 | 0.313 | 0.968          | GWOLGB15 | 0.989  | 0.992 | 0.225 | 0.317 | 0.967          |
| 6    | GWORF15 | 0.966  | 0.991 | 0.233 | 0.327 | 0.965          | GWOXGB13 | 0.118  | 0.983 | 0.335 | 0.448 | 0.935          | GWOLGB13 | 0.107  | 0.983 | 0.336 | 0.448 | 0.935          |
| 7    | GWORF13 | 0.044  | 0.982 | 0.339 | 0.455 | 0.932          | GWOXGB11 | 0.061  | 0.981 | 0.314 | 0.467 | 0.929          | GWOLGB11 | 0.054  | 0.981 | 0.310 | 0.468 | 0.929          |
| 8    | GWORF11 | 0.003  | 0.981 | 0.312 | 0.473 | 0.927          | GWOXGB12 | -0.103 | 0.979 | 0.327 | 0.490 | 0.922          | GWOLGB12 | -0.091 | 0.979 | 0.325 | 0.486 | 0.923          |
| 9    | GWORF12 | -0.156 | 0.979 | 0.328 | 0.492 | 0.921          | GWOXGB7  | -0.105 | 0.979 | 0.325 | 0.492 | 0.921          | GWOLGB7  | -0.094 | 0.979 | 0.323 | 0.488 | 0.922          |
| 10   | GWORF7  | -0.182 | 0.979 | 0.327 | 0.497 | 0.919          | GWOXGB9  | -0.159 | 0.979 | 0.334 | 0.497 | 0.919          | GWOLGB9  | -0.148 | 0.979 | 0.333 | 0.494 | 0.921          |
| 11   | GWORF5  | -0.345 | 0.977 | 0.352 | 0.513 | 0.914          | GWOXGB5  | -0.267 | 0.977 | 0.349 | 0.510 | 0.915          | GWOLGB5  | -0.266 | 0.978 | 0.349 | 0.507 | 0.916          |
| 12   | GWORF3  | -0.580 | 0.975 | 0.395 | 0.534 | 0.907          | GWOXGB3  | -0.487 | 0.976 | 0.394 | 0.530 | 0.908          | GWOLGB14 | -0.504 | 0.975 | 0.379 | 0.535 | 0.907          |
| 13   | GWORF14 | -0.590 | 0.974 | 0.379 | 0.541 | 0.905          | GWOXGB14 | -0.514 | 0.975 | 0.379 | 0.540 | 0.905          | GWOLGB3  | -0.507 | 0.975 | 0.394 | 0.531 | 0.908          |
| 14   | GWORF4  | -0.833 | 0.972 | 0.409 | 0.566 | 0.896          | GWOXGB4  | -0.701 | 0.972 | 0.405 | 0.560 | 0.898          | GWOLGB4  | -0.710 | 0.972 | 0.405 | 0.558 | 0.899          |
| 15   | GWORF10 | -1.104 | 0.968 | 0.411 | 0.604 | 0.881          | GWOXGB10 | -1.049 | 0.967 | 0.411 | 0.610 | 0.879          | GWOLGB10 | -1.012 | 0.968 | 0.410 | 0.601 | 0.882          |
| 16   | GWORF6  | -1.405 | 0.964 | 0.438 | 0.636 | 0.868          | GWOXGB6  | -1.319 | 0.963 | 0.441 | 0.638 | 0.867          | GWOLGB6  | -1.301 | 0.964 | 0.438 | 0.633 | 0.869          |
| 17   | GWORF2  | -1.731 | 0.960 | 0.487 | 0.662 | 0.857          | GWOXGB2  | -1.573 | 0.961 | 0.485 | 0.659 | 0.859          | GWOLGB2  | -1.585 | 0.961 | 0.486 | 0.658 | 0.859          |
| 18   | GWORF1  | -2.077 | 0.956 | 0.520 | 0.695 | 0.842          | GWOXGB1  | -1.942 | 0.955 | 0.520 | 0.697 | 0.842          | GWOLGB1  | -1.945 | 0.956 | 0.520 | 0.694 | 0.843          |

**Table S25.** Performance indicators of hybrid ML models at Raipur

| RANK | MODEL   | GPI    | d     | MBE   | RMSE  | R <sup>2</sup> | MODEL    | GPI    | d     | MBE   | RMSE  | R <sup>2</sup> | MODEL    | GPI    | d     | MBE   | RMSE  | R <sup>2</sup> |
|------|---------|--------|-------|-------|-------|----------------|----------|--------|-------|-------|-------|----------------|----------|--------|-------|-------|-------|----------------|
| 1    | GWORF17 | 2.032  | 0.997 | 0.108 | 0.186 | 0.990          | GWOXGB17 | 2.184  | 0.999 | 0.077 | 0.125 | 0.995          | GWOLGB17 | 2.174  | 0.999 | 0.082 | 0.136 | 0.995          |
| 2    | GWORF18 | 2.001  | 0.997 | 0.111 | 0.193 | 0.989          | GWOXGB18 | 2.171  | 0.999 | 0.077 | 0.130 | 0.995          | GWOLGB18 | 2.162  | 0.999 | 0.084 | 0.138 | 0.994          |
| 3    | GWORF16 | 1.646  | 0.995 | 0.173 | 0.257 | 0.981          | GWOXGB16 | 1.765  | 0.996 | 0.153 | 0.219 | 0.986          | GWOLGB16 | 1.771  | 0.996 | 0.156 | 0.223 | 0.985          |
| 4    | GWORF8  | 1.464  | 0.993 | 0.181 | 0.301 | 0.974          | GWOXGB8  | 1.481  | 0.994 | 0.177 | 0.290 | 0.975          | GWOLGB8  | 1.510  | 0.994 | 0.178 | 0.286 | 0.976          |
| 5    | GWORF9  | 1.415  | 0.993 | 0.187 | 0.310 | 0.972          | GWOXGB15 | 1.216  | 0.992 | 0.228 | 0.333 | 0.967          | GWOLGB15 | 1.216  | 0.992 | 0.230 | 0.335 | 0.967          |
| 6    | GWORF15 | 1.154  | 0.991 | 0.236 | 0.347 | 0.965          | GWOXGB13 | 0.448  | 0.984 | 0.338 | 0.458 | 0.939          | GWOLGB13 | 0.427  | 0.984 | 0.340 | 0.462 | 0.937          |
| 7    | GWORF13 | 0.337  | 0.983 | 0.343 | 0.470 | 0.935          | GWOXGB11 | 0.290  | 0.981 | 0.336 | 0.490 | 0.930          | GWOLGB11 | 0.313  | 0.982 | 0.332 | 0.488 | 0.930          |
| 8    | GWORF11 | 0.214  | 0.981 | 0.337 | 0.496 | 0.928          | GWOXGB3  | -0.140 | 0.976 | 0.399 | 0.547 | 0.912          | GWOLGB3  | -0.120 | 0.977 | 0.396 | 0.545 | 0.913          |
| 9    | GWORF3  | -0.222 | 0.976 | 0.399 | 0.549 | 0.912          | GWOXGB7  | -0.396 | 0.972 | 0.377 | 0.601 | 0.894          | GWOLGB7  | -0.415 | 0.971 | 0.379 | 0.602 | 0.894          |
| 10   | GWORF7  | -0.520 | 0.971 | 0.380 | 0.606 | 0.892          | GWOXGB12 | -0.454 | 0.971 | 0.388 | 0.607 | 0.892          | GWOLGB12 | -0.443 | 0.971 | 0.392 | 0.603 | 0.893          |
| 11   | GWORF12 | -0.528 | 0.971 | 0.390 | 0.604 | 0.893          | GWOXGB9  | -0.520 | 0.970 | 0.397 | 0.615 | 0.889          | GWOLGB9  | -0.522 | 0.970 | 0.399 | 0.613 | 0.890          |
| 12   | GWORF5  | -0.712 | 0.969 | 0.412 | 0.624 | 0.886          | GWOXGB5  | -0.592 | 0.969 | 0.412 | 0.621 | 0.887          | GWOLGB5  | -0.597 | 0.969 | 0.412 | 0.622 | 0.887          |
| 13   | GWORF14 | -0.811 | 0.968 | 0.422 | 0.636 | 0.881          | GWOXGB14 | -0.707 | 0.968 | 0.422 | 0.636 | 0.881          | GWOLGB14 | -0.707 | 0.968 | 0.424 | 0.635 | 0.882          |
| 14   | GWORF4  | -1.072 | 0.965 | 0.459 | 0.662 | 0.871          | GWOXGB4  | -0.928 | 0.965 | 0.459 | 0.659 | 0.873          | GWOLGB4  | -0.944 | 0.965 | 0.457 | 0.660 | 0.872          |
| 15   | GWORF10 | -1.251 | 0.962 | 0.470 | 0.685 | 0.862          | GWOXGB10 | -1.119 | 0.962 | 0.468 | 0.686 | 0.862          | GWOLGB10 | -1.097 | 0.962 | 0.467 | 0.681 | 0.864          |
| 16   | GWORF6  | -1.531 | 0.958 | 0.499 | 0.715 | 0.850          | GWOXGB6  | -1.392 | 0.958 | 0.502 | 0.715 | 0.850          | GWOLGB6  | -1.413 | 0.958 | 0.503 | 0.715 | 0.850          |
| 17   | GWORF2  | -1.647 | 0.957 | 0.517 | 0.725 | 0.846          | GWOXGB2  | -1.491 | 0.957 | 0.517 | 0.724 | 0.846          | GWOLGB2  | -1.490 | 0.957 | 0.516 | 0.723 | 0.847          |
| 18   | GWORF1  | -1.968 | 0.953 | 0.552 | 0.757 | 0.832          | GWOXGB1  | -1.816 | 0.952 | 0.556 | 0.758 | 0.832          | GWOLGB1  | -1.826 | 0.952 | 0.553 | 0.757 | 0.832          |

**Table S26.** Performance indicators of hybrid ML models at Ranchi

| RANK | MODEL   | GPI    | d     | MBE   | RMSE  | R <sup>2</sup> | MODEL    | GPI    | d     | MBE   | RMSE  | R <sup>2</sup> | MODEL    | GPI    | d     | MBE   | RMSE  | R <sup>2</sup> |
|------|---------|--------|-------|-------|-------|----------------|----------|--------|-------|-------|-------|----------------|----------|--------|-------|-------|-------|----------------|
| 1    | GWORF17 | 1.916  | 0.996 | 0.107 | 0.167 | 0.984          | GWOXGB18 | 2.025  | 0.999 | 0.062 | 0.092 | 0.995          | GWOLGB17 | 2.014  | 0.998 | 0.065 | 0.105 | 0.994          |
| 2    | GWORF18 | 1.898  | 0.996 | 0.108 | 0.171 | 0.983          | GWOXGB17 | 2.021  | 0.999 | 0.064 | 0.092 | 0.995          | GWOLGB18 | 1.995  | 0.998 | 0.071 | 0.107 | 0.993          |
| 3    | GWORF8  | 1.601  | 0.992 | 0.149 | 0.224 | 0.970          | GWOXGB8  | 1.493  | 0.993 | 0.142 | 0.211 | 0.974          | GWOLGB8  | 1.505  | 0.993 | 0.143 | 0.213 | 0.973          |
| 4    | GWORF9  | 1.563  | 0.992 | 0.152 | 0.231 | 0.968          | GWOXGB16 | 1.259  | 0.990 | 0.184 | 0.250 | 0.963          | GWOLGB16 | 1.248  | 0.990 | 0.187 | 0.255 | 0.961          |
| 5    | GWORF16 | 1.204  | 0.988 | 0.207 | 0.283 | 0.953          | GWOXGB15 | 0.958  | 0.986 | 0.224 | 0.302 | 0.946          | GWOLGB15 | 0.954  | 0.986 | 0.226 | 0.305 | 0.945          |
| 6    | GWORF15 | 0.995  | 0.985 | 0.233 | 0.315 | 0.941          | GWOXGB12 | 0.683  | 0.980 | 0.236 | 0.357 | 0.924          | GWOLGB12 | 0.696  | 0.980 | 0.235 | 0.356 | 0.925          |
| 7    | GWORF12 | 0.742  | 0.980 | 0.240 | 0.362 | 0.922          | GWOXGB9  | 0.635  | 0.979 | 0.242 | 0.364 | 0.922          | GWOLGB9  | 0.645  | 0.979 | 0.241 | 0.364 | 0.922          |
| 8    | GWORF7  | 0.616  | 0.978 | 0.254 | 0.379 | 0.915          | GWOXGB7  | 0.557  | 0.978 | 0.253 | 0.375 | 0.917          | GWOLGB7  | 0.571  | 0.978 | 0.251 | 0.374 | 0.917          |
| 9    | GWORF5  | 0.591  | 0.977 | 0.260 | 0.380 | 0.914          | GWOXGB5  | 0.552  | 0.978 | 0.256 | 0.374 | 0.917          | GWOLGB5  | 0.563  | 0.978 | 0.257 | 0.373 | 0.918          |
| 10   | GWORF4  | 0.030  | 0.968 | 0.330 | 0.447 | 0.881          | GWOXGB4  | 0.029  | 0.968 | 0.327 | 0.443 | 0.884          | GWOLGB14 | 0.056  | 0.969 | 0.322 | 0.441 | 0.885          |
| 11   | GWORF14 | 0.026  | 0.968 | 0.327 | 0.450 | 0.880          | GWOXGB14 | 0.020  | 0.968 | 0.325 | 0.446 | 0.882          | GWOLGB4  | 0.032  | 0.969 | 0.327 | 0.443 | 0.884          |
| 12   | GWORF11 | -1.062 | 0.944 | 0.417 | 0.575 | 0.804          | GWOXGB11 | -0.933 | 0.946 | 0.412 | 0.565 | 0.811          | GWOLGB11 | -0.927 | 0.946 | 0.409 | 0.563 | 0.812          |
| 13   | GWORF13 | -1.132 | 0.943 | 0.433 | 0.578 | 0.802          | GWOXGB13 | -1.003 | 0.945 | 0.429 | 0.569 | 0.807          | GWOLGB13 | -1.001 | 0.945 | 0.426 | 0.569 | 0.808          |
| 14   | GWORF3  | -1.343 | 0.938 | 0.453 | 0.599 | 0.787          | GWOXGB3  | -1.216 | 0.939 | 0.450 | 0.592 | 0.792          | GWOLGB3  | -1.223 | 0.940 | 0.449 | 0.591 | 0.792          |
| 15   | GWORF6  | -1.741 | 0.928 | 0.475 | 0.642 | 0.756          | GWOXGB6  | -1.569 | 0.929 | 0.470 | 0.633 | 0.762          | GWOLGB6  | -1.574 | 0.930 | 0.468 | 0.632 | 0.763          |
| 16   | GWORF10 | -1.754 | 0.928 | 0.474 | 0.645 | 0.754          | GWOXGB10 | -1.597 | 0.929 | 0.471 | 0.639 | 0.758          | GWOLGB10 | -1.607 | 0.930 | 0.470 | 0.638 | 0.759          |
| 17   | GWORF1  | -2.067 | 0.920 | 0.510 | 0.668 | 0.735          | GWOXGB1  | -1.940 | 0.920 | 0.511 | 0.668 | 0.735          | GWOLGB1  | -1.965 | 0.920 | 0.510 | 0.667 | 0.735          |
| 18   | GWORF2  | -2.083 | 0.920 | 0.510 | 0.672 | 0.733          | GWOXGB2  | -1.975 | 0.920 | 0.514 | 0.674 | 0.731          | GWOLGB2  | -1.982 | 0.920 | 0.512 | 0.672 | 0.733          |

**Table S27.** Performance indicators of hybrid ML models at Ranichauri

| RANK | MODEL   | GPI    | d     | MBE   | RMSE  | R <sup>2</sup> | MODEL    | GPI    | d     | MBE   | RMSE  | R <sup>2</sup> | MODEL    | GPI    | d     | MBE   | RMSE  | R <sup>2</sup> |
|------|---------|--------|-------|-------|-------|----------------|----------|--------|-------|-------|-------|----------------|----------|--------|-------|-------|-------|----------------|
| 1    | GWORF18 | 1.632  | 0.997 | 0.084 | 0.127 | 0.989          | GWOXGB17 | 1.711  | 0.999 | 0.056 | 0.083 | 0.995          | GWOLGB17 | 1.707  | 0.999 | 0.056 | 0.082 | 0.996          |
| 2    | GWORF17 | 1.592  | 0.997 | 0.090 | 0.133 | 0.988          | GWOXGB18 | 1.700  | 0.999 | 0.058 | 0.085 | 0.995          | GWOLGB18 | 1.699  | 0.999 | 0.057 | 0.083 | 0.995          |
| 3    | GWORF7  | 1.216  | 0.994 | 0.135 | 0.190 | 0.976          | GWOXGB7  | 1.150  | 0.994 | 0.129 | 0.182 | 0.978          | GWOLGB7  | 1.144  | 0.994 | 0.129 | 0.182 | 0.978          |
| 4    | GWORF9  | 0.922  | 0.991 | 0.170 | 0.229 | 0.965          | GWOXGB8  | 0.844  | 0.991 | 0.167 | 0.227 | 0.966          | GWOLGB8  | 0.840  | 0.991 | 0.167 | 0.226 | 0.966          |
| 5    | GWORF12 | 0.920  | 0.991 | 0.170 | 0.229 | 0.965          | GWOXGB9  | 0.830  | 0.991 | 0.169 | 0.228 | 0.965          | GWOLGB9  | 0.836  | 0.991 | 0.168 | 0.226 | 0.966          |
| 6    | GWORF8  | 0.913  | 0.991 | 0.171 | 0.230 | 0.965          | GWOXGB12 | 0.823  | 0.991 | 0.170 | 0.229 | 0.965          | GWOLGB12 | 0.830  | 0.991 | 0.169 | 0.227 | 0.966          |
| 7    | GWORF5  | 0.800  | 0.990 | 0.184 | 0.244 | 0.960          | GWOXGB5  | 0.717  | 0.990 | 0.183 | 0.244 | 0.961          | GWOLGB5  | 0.719  | 0.990 | 0.182 | 0.242 | 0.961          |
| 8    | GWORF16 | 0.464  | 0.985 | 0.210 | 0.290 | 0.944          | GWOXGB16 | 0.470  | 0.987 | 0.204 | 0.279 | 0.948          | GWOLGB16 | 0.455  | 0.986 | 0.203 | 0.282 | 0.947          |
| 9    | GWORF14 | 0.230  | 0.982 | 0.232 | 0.318 | 0.933          | GWOXGB14 | 0.195  | 0.983 | 0.231 | 0.314 | 0.934          | GWOLGB14 | 0.193  | 0.983 | 0.231 | 0.314 | 0.934          |
| 10   | GWORF15 | 0.014  | 0.980 | 0.255 | 0.340 | 0.923          | GWOXGB15 | -0.006 | 0.980 | 0.252 | 0.337 | 0.924          | GWOLGB15 | -0.013 | 0.980 | 0.253 | 0.338 | 0.924          |
| 11   | GWORF10 | -0.163 | 0.976 | 0.257 | 0.365 | 0.911          | GWOXGB10 | -0.198 | 0.976 | 0.258 | 0.364 | 0.912          | GWOLGB10 | -0.170 | 0.977 | 0.255 | 0.361 | 0.913          |
| 12   | GWORF4  | -0.214 | 0.976 | 0.276 | 0.364 | 0.912          | GWOXGB4  | -0.216 | 0.977 | 0.274 | 0.360 | 0.913          | GWOLGB4  | -0.231 | 0.977 | 0.275 | 0.362 | 0.913          |
| 13   | GWORF11 | -0.660 | 0.969 | 0.301 | 0.414 | 0.886          | GWOXGB11 | -0.668 | 0.969 | 0.302 | 0.414 | 0.886          | GWOLGB11 | -0.646 | 0.969 | 0.300 | 0.412 | 0.887          |
| 14   | GWORF13 | -0.951 | 0.965 | 0.333 | 0.439 | 0.872          | GWOXGB13 | -0.869 | 0.966 | 0.329 | 0.431 | 0.876          | GWOLGB13 | -0.868 | 0.966 | 0.329 | 0.431 | 0.876          |
| 15   | GWORF6  | -1.033 | 0.963 | 0.332 | 0.449 | 0.866          | GWOXGB6  | -1.015 | 0.963 | 0.332 | 0.448 | 0.866          | GWOLGB6  | -1.014 | 0.963 | 0.331 | 0.449 | 0.866          |
| 16   | GWORF2  | -1.353 | 0.958 | 0.366 | 0.475 | 0.850          | GWOXGB2  | -1.328 | 0.958 | 0.366 | 0.475 | 0.850          | GWOLGB2  | -1.315 | 0.958 | 0.366 | 0.474 | 0.850          |
| 17   | GWORF3  | -1.960 | 0.947 | 0.407 | 0.528 | 0.814          | GWOXGB3  | -1.851 | 0.948 | 0.404 | 0.522 | 0.818          | GWOLGB3  | -1.873 | 0.948 | 0.406 | 0.526 | 0.816          |
| 18   | GWORF1  | -2.368 | 0.939 | 0.439 | 0.559 | 0.792          | GWOXGB1  | -2.289 | 0.939 | 0.437 | 0.558 | 0.793          | GWOLGB1  | -2.293 | 0.939 | 0.440 | 0.558 | 0.793          |

**Table S28.** Performance indicators of hybrid ML models at Samastipur

| RANK | MODEL   | GPI    | d     | MBE   | RMSE  | R <sup>2</sup> | MODEL    | GPI    | d     | MBE   | RMSE  | R <sup>2</sup> | MODEL    | GPI    | d     | MBE   | RMSE  | R <sup>2</sup> |
|------|---------|--------|-------|-------|-------|----------------|----------|--------|-------|-------|-------|----------------|----------|--------|-------|-------|-------|----------------|
| 1    | GWORF17 | 1.603  | 0.997 | 0.113 | 0.175 | 0.988          | GWOXGB17 | 1.714  | 0.999 | 0.074 | 0.104 | 0.996          | GWOLGB17 | 1.694  | 0.999 | 0.074 | 0.104 | 0.996          |
| 2    | GWORF18 | 1.516  | 0.996 | 0.119 | 0.207 | 0.983          | GWOXGB18 | 1.683  | 0.999 | 0.080 | 0.115 | 0.995          | GWOLGB18 | 1.659  | 0.999 | 0.080 | 0.117 | 0.995          |
| 3    | GWORF8  | 1.223  | 0.992 | 0.186 | 0.273 | 0.970          | GWOXGB8  | 1.178  | 0.993 | 0.183 | 0.264 | 0.972          | GWOLGB8  | 1.178  | 0.993 | 0.181 | 0.258 | 0.973          |
| 4    | GWORF9  | 1.221  | 0.992 | 0.186 | 0.273 | 0.970          | GWOXGB16 | 0.944  | 0.989 | 0.221 | 0.326 | 0.958          | GWOLGB16 | 0.956  | 0.990 | 0.218 | 0.318 | 0.960          |
| 5    | GWORF16 | 0.968  | 0.989 | 0.230 | 0.332 | 0.956          | GWOXGB7  | 0.796  | 0.987 | 0.249 | 0.359 | 0.948          | GWOLGB7  | 0.774  | 0.987 | 0.250 | 0.360 | 0.948          |
| 6    | GWORF7  | 0.810  | 0.986 | 0.255 | 0.368 | 0.946          | GWOXGB9  | 0.624  | 0.983 | 0.277 | 0.397 | 0.937          | GWOLGB15 | 0.646  | 0.985 | 0.280 | 0.385 | 0.940          |
| 7    | GWORF15 | 0.654  | 0.984 | 0.287 | 0.396 | 0.937          | GWOXGB12 | 0.623  | 0.983 | 0.275 | 0.399 | 0.936          | GWOLGB12 | 0.622  | 0.984 | 0.273 | 0.396 | 0.937          |
| 8    | GWORF12 | 0.578  | 0.982 | 0.285 | 0.419 | 0.930          | GWOXGB15 | 0.605  | 0.983 | 0.287 | 0.398 | 0.937          | GWOLGB9  | 0.611  | 0.983 | 0.276 | 0.398 | 0.937          |
| 9    | GWORF5  | 0.524  | 0.981 | 0.305 | 0.424 | 0.928          | GWOXGB5  | 0.501  | 0.981 | 0.303 | 0.421 | 0.929          | GWOLGB5  | 0.497  | 0.981 | 0.301 | 0.419 | 0.929          |
| 10   | GWORF14 | 0.063  | 0.972 | 0.375 | 0.511 | 0.895          | GWOXGB14 | 0.050  | 0.972 | 0.377 | 0.510 | 0.896          | GWOLGB14 | 0.067  | 0.973 | 0.371 | 0.506 | 0.898          |
| 11   | GWORF4  | -0.281 | 0.964 | 0.427 | 0.569 | 0.870          | GWOXGB4  | -0.258 | 0.965 | 0.426 | 0.565 | 0.872          | GWOLGB4  | -0.262 | 0.965 | 0.424 | 0.564 | 0.872          |
| 12   | GWORF13 | -0.507 | 0.959 | 0.445 | 0.612 | 0.850          | GWOXGB13 | -0.502 | 0.959 | 0.444 | 0.615 | 0.849          | GWOLGB13 | -0.501 | 0.959 | 0.444 | 0.612 | 0.850          |
| 13   | GWORF10 | -0.716 | 0.952 | 0.455 | 0.651 | 0.830          | GWOXGB10 | -0.641 | 0.954 | 0.449 | 0.641 | 0.835          | GWOLGB10 | -0.654 | 0.954 | 0.450 | 0.642 | 0.835          |
| 14   | GWORF11 | -0.914 | 0.948 | 0.484 | 0.679 | 0.815          | GWOXGB11 | -0.861 | 0.948 | 0.482 | 0.675 | 0.817          | GWOLGB11 | -0.821 | 0.949 | 0.475 | 0.667 | 0.821          |
| 15   | GWORF3  | -1.216 | 0.940 | 0.531 | 0.720 | 0.792          | GWOXGB3  | -1.191 | 0.940 | 0.534 | 0.722 | 0.791          | GWOLGB3  | -1.189 | 0.940 | 0.533 | 0.722 | 0.791          |
| 16   | GWORF2  | -1.460 | 0.934 | 0.563 | 0.754 | 0.772          | GWOXGB2  | -1.419 | 0.934 | 0.566 | 0.756 | 0.771          | GWOLGB2  | -1.395 | 0.934 | 0.562 | 0.752 | 0.773          |
| 17   | GWORF6  | -1.671 | 0.926 | 0.565 | 0.790 | 0.750          | GWOXGB6  | -1.560 | 0.928 | 0.561 | 0.782 | 0.755          | GWOLGB6  | -1.577 | 0.927 | 0.562 | 0.784 | 0.754          |
| 18   | GWORF1  | -2.397 | 0.905 | 0.665 | 0.875 | 0.693          | GWOXGB1  | -2.286 | 0.905 | 0.663 | 0.871 | 0.696          | GWOLGB1  | -2.306 | 0.905 | 0.666 | 0.874 | 0.694          |
